# Supplementary material for: Regulatory polymorphisms modulate the expression of HLA class II molecules and promote autoimmunity
Source: eLife. 2016 Feb 15;5:e12089. doi: 10.7554/eLife.12089 (PMC4811771; doi:10.7554/eLife.12089)
Supplement: Supplementary file 1. — DOI: http://dx.doi.org/10.7554/eLife.12089.021 [file elife-12089-supp1.xlsx]

## Sheet: 1A
Supplemental File 1A. SLE patients and controls analyzed in this study
Institution	Contributing Investigators	Total Samples	SLE	Healthy controls
University of Texas Southwestern Medical Center	D. Karp, N. Olsen, C. Garcia	592	159	433
Texas Scottish Rite Hospital for Children	C. Wise	180	0	180
University of California at Los Angeles	B. Tsao	375	375	0
University of Southern California	C. Jacob	264	264	0
Oklahoma Medical Research Foundation	P. Gaffney, J. Kelly, J. James	190	101	89
Université Catholique de Louvain, Brussels, Belgium	B. Lauwerys	174	174	0
Totals		1775	1073	702

## Sheet: 1B
Supplemental File 1B. Genomic intervals of SLE risk loci targeted for sequencing
Risk locus/gene	Chr	Centromeric terminus of targeted region	Telomeric terminus of targeted region	Targeted region (bp)	Average fold coverage	Total number of variants identified	Pass filter/quality variants in locus	Variant frequency/KB	Low frequency or rare variants (MAF<0.05)	Common variants (MAF≥0.05)
										Total variants detected	Annotated		Novel
											SNV	In/Del	SNV	In/Del
TNFSF4	1	173152283	173312531	160249	104.609	4745	2876	17.9471	2603	273	227	46	0	0
NMNAT2	1	183215379	183525000	309622	124.762	12482	7996	25.825	7389	607	488	114	2	3
IL10	1	206938894	206956000	17107	139.97	717	349	20.401	315	34	32	2	0	0
STAT4	2	191892306	191996518	104213	100.168	3622	2273	21.8111	2120	153	133	20	0	0
IFIH1	2	163123000	163176039	53040	103.051	1677	750	14.1403	742	8	8	0	0	0
PXK	3	58316617	58411878	95262	116.96	4933	3011	31.6076	2609	402	332	68	0	2
BANK1	4	102709764	103047977	338214	96.2835	11292	7066	20.8921	6382	684	574	105	4	1
TNIP1	5	150408437	150469133	60697	183.137	2282	1628	26.8218	1452	176	151	24	1	0
PTTG1	5	159848689	159855963	7275	126.184	222	159	21.8557	145	14	9	5	0	0
BTNL2_HLA	6	32360000	32740000	380001	78.4498	44121	27205	71.5919	12076	15129	13408	1691	11	19
TNFAIP3	6	138000000	138310000	310001	127.802	2238	7724	24.916	7105	619	486	133	0	0
PRDM1-ATG5	6	106532193	106591857	59665	155.152	11949	1507	25.2577	1364	143	118	25	0	0
ICA1	7	8141991	8369005	227015	116.388	9043	3855	16.9813	3379	476	440	36	0	0
IRF5	7	128543678	128771955	228278	117.523	11327	6618	28.991	6048	570	455	115	0	0
XKR6	8	10737657	11059875	322219	159.141	14897	9845	30.5538	8905	940	821	114	2	3
C8orf12_BLK	8	11338153	11423735	85583	160.54	4411	3061	35.7664	2750	311	273	36	0	2
ETS1	11	128309085	128460001	150917	144.998	5064	2278	15.0944	1988	290	233	54	3	0
KIAA1542_IRF7	11	558884	643568	84685	144.665	4741	2773	32.7449	2478	295	243	51	1	0
ITGAM	16	31240000	31400000	160001	98.4238	8050	3920	24.4998	3576	344	248	90	3	3
CCl22	16	57380000	57420000	40001	127.042	2250	631	15.7746	574	57	51	6	0	0
IRF8	16	85927623	85982583	54961	197.57	2299	1607	29.2389	1346	261	243	18	0	0
TNFRSF13B	17	16842000	16890000	48001	139.163	2170	788	16.4163	668	120	114	6	0	0
AIOLOS_IKZF3	17	37870474	38096474	226001	113.094	10888	6497	28.7477	6250	247	175	69	2	1
RAVER1-ZGLP1 (TYK2)	19	10372281	10493248	120968	104.027	8401	3238	26.7674	2980	258	195	57	4	2
UBE2L3	22	21904834	21987621	82788	122.366	5097	2119	25.5955	2005	114	90	22	1	1
SCUBE1	22	43491269	43787833	296565	166.369	15215	9759	32.9068	8766	993	831	161	1	0
TLR7/TLR8	X	12880079	12945759	65681	117.733	2083	1484	22.5941	1355	129	106	22	0	1
MECP2_IRAK	X	153168806	153387422	218617	125.879	9664	3535	16.1698	3377	158	112	43	0	3
Totals				4307627	128.98	215880	124552	Ave. 26/Kb	100747	23805	20596	3133	35	41

## Sheet: 1C
Supplemental File 1C. Characteristics of unannotated/novel common variants (MAF≥0.05) detected in this study
Risk locus/gene	Novel SNVs	Novel Deletions	Novel Insertions	Total Novel	Potentailly functional
NMNAT2	2	3	0	5	0
PXK	0	2	0	2	0
BANK1	4	1	0	5	1
TNIP1	1	0	0	1	1
BTNL2_HLA	11	7	12	30	23
XKR6	2	3	0	5	1
C8orf12_BLK	0	1	1	2	1
ETS1	3	0	0	3	2
KIAA1542_IRF7	1	0	0	1	1
ITGAM	3	1	2	6	2
AIOLOS_IKZF3	2	1	0	3	0
RAVER1-ZGLP1	4	2	0	6	1
UBE2L3	1	1	0	2	1
SCUBE1	1	0	0	1	0
TLR7/TLR8	0	1	0	1	0
MECP2_IRAK	0	3	0	3	1
Total	35	26	15	76	35
Reference: ftp://ftp.1000genomes.ebi.ac.uk/vol1/ftp/release/20130502/

## Sheet: 1D
Supplemental File 1D. Peak association signal detected for each of the 28 SLE risk loci
Risk locus/gene	Chr	Centromeric terminal of targeted region	Telomeric terminal of targeted region	rsID	Peak SNP p value in interval	Sinficance level of association
TNFSF4	1	173152283	173312531	rs1819717	2.29e-05	Suggestive
NMNAT2	1	183215379	183525000	rs41272536	1.87834e-08	Genomewide
IL10	1	206938894	206956000	rs1800890	0.000176	Confirmatory
IFIH1	2	163123000	163176039	rs1990760	0.00252817	Confirmatory
STAT4	2	191892306	191996518	rs12612769	5.17316e-10	Genomewide
PXK	3	58316617	58411878	rs373583348	0.00236	Confirmatory
BANK1	4	102709764	103047977	rs4699260	8.54999e-06	Suggestive
TNIP1	5	150408437	150469133	rs62382335	6.41903e-05	Confirmatory
PTTG1	5	159848689	159855963	rs2961950	0.0181	NS
BTNL2_HLA	6	32360000	32740000	rs9271593	6.50443e-10	Genomewide
PRDM1	6	106532193	106591857	rs72943416	0.00782452	NS
TNFAIP3	6	138000000	138310000	rs57087937	2.05032e-06	Suggestive
ICA1	7	8141991	8369005	rs74787882	4.28805e-06	Suggestive
IRF5_TNPO3	7	128543678	128771955	rs34350562	2.86807e-09	Genomewide
XKR6	8	10737657	11059875	rs4840545	1.26935e-07	Suggestive
C8orf12_BLK	8	11338153	11423735	rs7822109	8.56562e-05	Confirmatory
IRF7_PHRF1	11	558884	643568	rs143803647	6.214e-06	Suggestive
ETS1	11	128309085	128460001	rs34516251	4.87116e-06	Suggestive
ITGAM	16	31240000	31400000	rs41476751	7.84481e-09	Genomewide
CCL22	16	57380000	57420000	rs223889	6.95142e-07	Suggestive
IRF8	16	85927623	85982583	rs9934701	7.20306e-05	Suggestive
TNFRSF13B	17	16842000	16890000	rs7225112	0.000305745	Confirmatory
AIOLOS_IKZF3	17	37870474	38096474	rs17676191	0.001225	Confirmatory
RAVER1-ZGLP1 (TYK2)	19	10372281	10493248	rs35186095	0.00021	Confirmatory
UBE2L3	22	21904834	21987621	rs181366	3.05497e-12	Genomewide
SCUBE1	22	43491269	43787833	rs4647815	5.468e-06	Suggestive
TLR7/8	X	12880079	12945759	X:12922288	4.62011e-13	Genomewide
MECP2_IRAK	X	153168806	153387422	X:153274263	0.0001296	Confirmatory

## Sheet: 1E
Supplemental File 1E. Disease association statistics for previously published GWAS tagging SNPs
Gene Name	Chromosome	position (hg19)	Identifier	Reference	Corrected P-Value	Odds Ratio (Minor Allele)	Minor Allele	Allele Freq. (Cases)	Allele Freq. (Controls)
STAT4	2	191970120	rs7582694	C	1.72172e-09	1.67816	C	0.338292	0.233507
STAT4	2	191969879	rs10181656	G	2.67441e-09	1.66366	G	0.336352	0.233507
STAT4	2	191964633	rs7574865	T	4.92673e-09	1.64558	T	0.331177	0.231304
STAT4	2	191902758	rs3821236	G	1.60933e-08	1.58879	A	0.307891	0.21875
HLA	6	32363816	rs2076530	T	2.21662e-08	0.6	C	0.34	0.46
STAT4	2	191973034	rs10174238	G	2.53361e-08	1.62726	G	0.343709	0.243478
ITGAM	16	31313253	rs9888739	C	4.63531e-08	1.82634	T	0.202335	0.121951
ITGAM	16	31336888	rs1143683	C	6.11254e-08	1.84914	T	0.23868	0.144965
ITGAX	16	31368874	rs11574637	T	1.04312e-07	1.77282	C	0.248383	0.157118
HLA	6	32050758	rs1150754	G	3.11169e-07	1.54003	A	0.229962	0.16242
ITGAM	16	31276811	rs1143679	G	7.05966e-07	1.81455	A	0.190168	0.114583
UBE2L3	22	21939675	rs5754217	G	1.18097e-06	1.4985	T	0.267788	0.196181
IRF5	7	128589000	rs2070197	T	2.47982e-06	1.57507	C	0.203752	0.139757
HLA	6	32427789	rs9268832	T	3.19403e-06	1.46	T	0.486417	0.394097
TNPO3	7	128617466	rs12531711	A	3.38999e-06	1.55754	G	0.203105	0.140625
IRF5	7	128594183	rs10488631	T	4.78518e-06	1.55132	C	0.202458	0.140625
UBE2L3	22	21941981	rs5998599	A	5.03339e-06	1.4622	G	0.258732	0.192708
UBE2L3	22	21964761	rs4821112	G	5.43782e-06	1.4624	A	0.261966	0.195312
UBE2L3	22	21928641	rs181359	G	6.32837e-06	1.45751	A	0.26132	0.195312
HLA	6	32602269	rs9272219	G	6.58863e-06	1.57	T	0.344114	0.250868
IRF5	7	128580680	rs3807306	G	1.15825e-05	0.694423	G	0.40815	0.498264
HLA	6	32628428	rs2854275	C	1.44783e-05	1.82	A	0.183053	0.109375
HLA	6	32664458	rs2647012	G	1.73541e-05	1.31443	A	0.480952	0.413472
TNFAIP3	6	138195723	rs5029939	C	2.8585e-05	2.09386	G	0.0834411	0.0416667
TNFAIP3	6	138196066	rs2230926	T	3.50084e-05	2.06661	G	0.084088	0.0425347
CCL22	16	57391768	rs223888	A	3.81394e-05	1.41882	A	0.270504	0.207198
IRF5	7	128568960	rs729302	A	5.17638e-05	0.673573	C	0.238034	0.31684
IRF5	7	128573967	rs4728142	G	5.47196e-05	0.724196	G	0.463777	0.544271
TNFAIP3	6	138197506	rs5029949	A	6.67706e-05	2.13825	G	0.0782665	0.0381944
TNFAIP3	6	138195151	rs5029937	G	7.0533e-05	2.05217	T	0.0835492	0.0425347
TNFAIP3	6	138132516	rs10499197	T	7.60786e-05	2.33101	G	0.0717982	0.0321181
HLA	6	32725193	rs2301271	C	0.000122865	1.28674	T	0.510496	0.447662
TNFAIP3	6	138230389	rs7749323	G	0.000178417	2.19218	A	0.0730918	0.0347222
ITGAX	16	31364493	rs4548893	C	0.000199947	1.48206	T	0.254851	0.1875
BANK1	4	102751076	rs10516487	G	0.000548378	0.790836	A	0.250323	0.296875
XKR6	8	10788875	rs11783247	C	0.000723384	1.20478	C	0.518758	0.472222
UBE2L3	22	21917190	rs131654	G	0.00174429	0.787941	G	0.295337	0.347222
HLA	6	32223258	rs3130320	C	0.00225445	1.21574	T	0.430344	0.383245
TNIP1	5	150457771	rs6889239	T	0.00471087	1.15825	C	0.331177	0.299479
TNIP1	5	150457485	rs7708392	G	0.00480277	1.16164	C	0.331824	0.299479
TNIP1	5	150458146	rs10036748	C	0.00529037	1.15825	T	0.331177	0.299479
HLA	6	32658310	rs9469220	G	0.0054012	1.3	A	0.428109	0.491304
IFIH1	2	163124051	rs1990760	C	0.00833828	1.2503	C	0.442982	0.388778
HLA	6	32586854	rs9271366	G	0.0089175	1.3	G	0.181113	0.145833
TNFSF4	1	173191475	rs2205960	G	0.0135764	1.17928	T	0.266192	0.235243
HLA	6	32730086	rs2051549	G	0.0162002	1.2223	G	0.483829	0.434028
IRF5	7	128589427	rs10954213	G	0.0165767	0.796396	G	0.329016	0.381076
ETS1	11	128317168	rs7932088	G	0.0178781	0.88406	T	0.343251	0.371542
XKR6	8	11045161	rs7819412	G	0.0181343	0.892256	A	0.474127	0.502604
BANK1	4	102839287	rs3733197	G	0.0200147	0.85175	A	0.294308	0.328696
BANK1	4	102854390	rs17208914	A	0.0215457	1.2106	G	0.507762	0.460069
ICA1	7	8187094	rs10156091	T	0.0250258	1.50862	T	0.122449	0.0846614
BLK	8	11391650	rs2248932	A	0.0318171	1.08396	A	0.405563	0.386285
BLK	8	11352485	rs2736345	A	0.0385167	1.12131	G	0.358344	0.332465
BLK	8	11351912	rs922483	C	0.0385341	1.13643	T	0.350582	0.322049
TNPO3	7	128594725	rs2280714	C	0.042175	0.787777	C	0.286546	0.337674
IRF8	16	85973028	rs12711490	T	0.0442308	0.819915	C	0.175938	0.206597
TNFSF4	1	173236065	rs10489265	A	0.0455622	1.13269	C	0.276843	0.252604
HLA	6	32605884	rs2187668	C	0.0523821	1.32441	T	0.0939153	0.0725806
IKZF3	17	37976469	rs9303277	C	0.106377	1.13401	T	0.507115	0.475694
IL10	1	206943968	rs3024493	C	0.158938	0.86333	A	0.155886	0.176215
TYK2	19	10472933	rs280519	A	0.247699	0.913839	G	0.474026	0.496528
MECP2	X	153325446	rs1734787	A	0.283294	1.10528	C	0.238251	0.220562
SCUBE1	22	43609760	rs2071725	G	0.452538	0.944792	A	0.110608	0.116319
NMNAT2	1	183353853	rs2022013	C	0.471108	1.03675	C	0.403622	0.394965
PRDM1	6	106568034	rs548234	C	0.620315	0.959934	C	0.32859	0.337674
IRF7	11	601785	rs2396545	T	0.771478	0.97282	C	0.211514	0.216146
PXK	3	58331186	rs2176082	G	0.792219	0.978196	A	0.31436	0.31913
TLR8/7	X	12927759	rs4830805	G	0.796117	1.02276	A	0.284595	0.280035

## Sheet: 1F
Supplemental File 1F. Variants identified by sequencing that are strongly associated with SLE
Risk locus/gene	Chr	Centromeric terminal of risk locus	Telomeric terminal of risk region	Variants with stronger disease association than GWAS tag	Catagorized as potentially functional
TNFSF4	1	173152283	173312531	45	32
NMNAT2	1	183215379	183525000	43	16
IL10	1	206938894	206956000	20	13
STAT4	2	163123000	163176039	0	0
IFIH1	2	191892306	191996518	2	1
PXK	3	58316617	58411878	7	2
BANK1	4	102709764	103047977	26	3
TNIP1	5	150408437	150469133	31	25
PTTG1	5	159848689	159855963	0	0
BTNL2_HLA	6	32360000	32740000	6	3
TNFAIP3	6	106532193	106591857	25	10
PRDM1-ATG5	6	138000000	138310000	17	11
ICA1	7	8141991	8369005	49	22
IRF5	7	128543678	128771955	32	20
XKR6	8	10737657	11059875	13	5
C8orf12_BLK	8	11338153	11423735	77	60
ETS1	11	558884	643568	21	18
KIAA1542_IRF7	11	128309085	128460001	8	3
ITGAM	16	31240000	31400000	4	3
CCl22	16	57380000	57420000	12	10
IRF8	16	85927623	85982583	16	8
TNFRSF13B	17	16842000	16890000	0	0
AIOLOS_IKZF3	17	37870474	38096474	18	6
RAVER1-ZGLP1 (TYK2)	19	10372281	10493248	43	29
UBE2L3	22	21904834	21987621	9	4
SCUBE1	22	43491269	43787833	90	28
TLR7/TLR8	X	12880079	12945759	30	6
MECP2_IRAK	X	153168806	153387422	29	7
Total variants				673	345
