# Supplementary material for: Regulatory polymorphisms modulate the expression of HLA class II molecules and promote autoimmunity
Source: eLife. 2016 Feb 15;5:e12089. doi: 10.7554/eLife.12089 (PMC4811771; doi:10.7554/eLife.12089)
Supplement: Supplementary file 2. — DOI: http://dx.doi.org/10.7554/eLife.12089.022 [file elife-12089-supp2.xlsx]

## Sheet: 2
Supplemental File 2. Summary of functional properties of all variants in tight LD with disease tagging SNPs used for haplotype analyis
Gene/Interval	MJ SNP Number	Marker	Chromosome	Position	SNP Identifier	Reference Allele	Transcription Factor Binding Site	ENCODE-defined TF Score	DNaseI cluster	ENCODE-defined cluster score	Histone Marks	Monocyte eQTL a	Monocyte eQTL b	PBMC eQTL	Macs eQTL	Coding Variations	Gender corrected p	Odds Ratio (Minor Allele)	Minor Allele	Allele Freq. (Cases)	Allele Freq. (Controls)	Major Allele	Odds Ratio (Major Allele)	Allele Freq. (Cases)	Allele Freq. (Controls)	Pot. functional criteria	eQTL Reference	RegulomeDB score	RegulomeDB annotation
TNFSF4 block 1	SNP1	1:173154304-SNV	1	173154304	rs7514229	G	?	?	?	?						Coding	0.000290433	1.3544	T	0.388312	0.31913	G	0.738336	0.611688	0.68087	Coding		7	Histone mark/Eqtl
TNFSF4 block 1	SNP2	1:173154354-SNV	1	173154354	rs61826345	A	?	?	?	?	4					Coding	0.0101113	1.35381	C	0.237013	0.186632	A	0.738659	0.762987	0.813368	Histone marks		6	Motif hit
TNFSF4 block 1	SNP3	1:173154539-SNV	1	173154539	rs17372309	T	?	?	?	?						Coding	0.0130366	1.34496	C	0.234799	0.185764	T	0.743514	0.765201	0.814236	Coding		6	Motif hit
TNFSF4 block 1	SNP4	1:173157163-SNV	1	173157163	rs17300347	T	CTCF, RAD21	678, 239	c-7	179							0.0105507	1.34981	A	0.235446	0.185764	T	0.740844	0.764554	0.814236	TF+DN		2b	Likely to affect binding
TNFSF4 block 1	SNP5	1:173157378-SNV	1	173157378	rs61828261	A	CTCF	678	?	?							0.0132289	1.33728	T	0.234799	0.186632	A	0.747785	0.765201	0.813368	TF		5	TF binding or DNase peak
TNFSF4 block 1	SNP6	1:173159516-SNV	1	173159516	rs4081545	T	POLR2A, STAT3, FOS, MYC, TFAP2A, E2F6	302, 231, 333, 267, 139, 155	c-93	1000	Hsmm						0.000246614	1.33567	C	0.390686	0.324348	T	0.74869	0.609314	0.675652	TF+DN+Histone		4	TF binding +DNase peak
TNFSF4 block 1	SNP7	1:173159620-SNV	1	173159620	rs4113832	C	POLR2A, MYC, TFAP2A, E2F6, TFAP2C, TAF1, GTF2F1, MYBL2, MBD4, NFIC, FOS	302, 267, 139, 155, 192, 113, 232, 305, 233, 470, 439	c-93	1000	Hsmm						0.0118359	1.34496	T	0.234799	0.185764	C	0.743514	0.765201	0.814236	TF+DN+Histone		4	TF binding +DNase peak
TNFSF4 block 1	SNP8	1:173164565-SNV	1	173164565	rs10912561	C	IKZF1	283	?	?	Hsmm						0.00738388	1.32704	T	0.285899	0.231771	C	0.753555	0.714101	0.768229	TF		4	TF binding +DNase peak
TNFSF4 block 1	SNP9	1:173164787-SNV	1	173164787	rs4916313	T	IKZF1, CEBPB, FOXM1, BATF, TBL1XR1, SPI1	283, 210, 287, 454, 262, 597	c-20	727	Hsmm						0.000229865	1.34388	C	0.386805	0.319444	T	0.744113	0.613195	0.680556	TF+DN+Histone		3a	Less likely to affect binding
TNFSF4 block 1	SNP10	1:173171673-SNV	1	173171673	rs11811856	C	CTCF, SMC3, JUND, ZNF143, RFX5, RAD21, FOS	1000, 179, 300, 199, 288	c-99	1000	Hsmm						0.00354633	1.29085	G	0.326003	0.272569	C	0.774681	0.673997	0.727431	TF+DN+Histone		4	TF binding +DNase peak
TNFSF4 block 1	SNP11	1:173172158-SNV	1	173172158	rs4916314	C	POLR2A, MAFK	156, 201	c-4	420	Hsmm						0.0249682	1.30993	A	0.234153	0.189236	C	0.763401	0.765847	0.810764	TF+DN+Histone		3a	Less likely to affect binding
TNFSF4 block 2	SNP1	1:173310061-SNV	1	173310061	rs6681162	A					2						0.00103256	0.762372	T	0.215395	0.264757	A	1.3117	0.784605	0.735243	His		6	Motif hit
TNFSF4 block 2	SNP2	1:173310285-SNV	1	173310285	rs1819717	C					5						2.29017e-05	0.733903	G	0.291896	0.359665	A	1.36258	0.708104	0.640335	His		7	Histone mark/Eqtl
TNFSF4 block 2	SNP3	1:173310298-SNV	1	173310298	rs34697014	A					4						8.26806e-05	0.748954	G	0.287551	0.350184	A	1.3352	0.712449	0.649816	His		6	Motif hit
TNFSF4 block 2	SNP4	1:173310742-SNV	1	173310742	rs34972373	C	FOS, EP300, CEBPB	362, 168, 213	c-45	1000	1						0.000854544	0.758512	T	0.216041	0.266493	C	1.31837	0.783959	0.733507	TF+DN+ His		2b	Likely to affect binding
TNFSF4 block 2	SNP5	1:173310806-SNV	1	173310806	rs34746916	A					5						0.00116954	0.765292	G	0.216041	0.264757	A	1.30669	0.783959	0.735243	His		5	TF binding or DNase peak
TNFSF4 block 2	SNP6	1:173311000-SNV	1	173311000	rs12752692	T					6						0.000231753	0.766015	C	0.291074	0.348958	T	1.30546	0.708926	0.651042	His		7	Histone mark/Eqtl
TNFSF4 block 2	SNP7	1:173311999-SNV	1	173311999	rs12742673	G			c-10	357							0.00145949	0.771655	A	0.216688	0.263889	G	1.29592	0.783312	0.736111	DNaseI		5	TF binding or DNase peak
NMNAT2 block 1	SNP1	1:183263797-SNV	1	183263797	rs115872210	C	?	?	?	?	2						0.0143228	1.26916	T	0.152949	0.124552	C	0.78792	0.847051	0.875448	His		7	Histone mark/Eqtl
NMNAT2 block 1	SNP2	1:183265406-SNV	1	183265406	rs12077549	T	?	?	?	?	2						0.0340738	1.26372	C	0.153183	0.125219	T	0.791315	0.846817	0.874781	His		6	Motif hit
NMNAT2 block 1	SNP3	1:183267920-SNV	1	183267920	rs12096687	C	?	?	?	?	2						0.0168532	1.26994	A	0.154592	0.125868	C	0.787438	0.845408	0.874132	His		6	Motif hit
NMNAT2 block 1	SNP4	1:183267934-SNV	1	183267934	rs12081676	T	?	?	?	?	2						0.0157888	1.27623	C	0.155239	0.125868	T	0.783557	0.844761	0.874132	His		7	Histone mark/Eqtl
NMNAT2 block 1	SNP5	1:183267935-SNV	1	183267935	rs12076338	G	?	?	?	?	2						0.0157888	1.27623	T	0.155239	0.125868	G	0.783557	0.844761	0.874132	His		7	Histone mark/Eqtl
NMNAT2 block 1	SNP6	1:183268041-SNV	1	183268041	rs12081719	T	?	?	1	101							0.0286179	1.25212	A	0.150712	0.124132	T	0.798645	0.849288	0.875868	DNaseI		5	TF binding or DNase peak
NMNAT2 block 1	SNP7	1:183268236-SNV	1	183268236	rs12076457	G	?	?	?	?	2						0.0390621	1.25436	A	0.156676	0.129004	G	0.79722	0.843324	0.870996	His		7	Histone mark/Eqtl
NMNAT2 block 1	SNP8	1:183310860-SNV	1	183310859	rs111487113	C	?	?	?	?	2						0.000522219	0.720502	A	0.132801	0.175287	C	1.38792	0.867199	0.824713	His		6	Motif hit
NMNAT2 block 2	SNP1	1:183314293-SNV	1	183314293	rs944190	G								SMG7, NCF2			0.0262608	1.15156	G	0.449547	0.414931	T	0.868386	0.550453	0.585069	Westra eQTL	Westra et al., 2013	6	Motif hit
NMNAT2 block 2	SNP2	1:183314641-SNV	1	183314641	rs1360277	T			2	344							0.0204454	1.16399	T	0.449547	0.412326	A	0.859112	0.550453	0.587674	DNaseI		5	TF binding or DNase peak
NMNAT2 block 2	SNP3	1:183317819-SNV	1	183317819	rs3924298	T						SMG7, NCF2		SMG7, NCF2			0.0418442	1.14118	T	0.460543	0.427951	G	0.876289	0.539457	0.572049	Fairfax and Westra eQTL	Fairfax et al. 2014	6	Motif hit
NMNAT2 block 2	SNP4	1:183440531-SNV	1	183440531	rs41272536	A	CTCF,Pol2, TAF1, E2F6,E2F6_(H-50),ZNF263, CCNT2, HA-E2F1, HMGN3, HEY1, AP-2gamma, AP-2alpha, E2F1, TBP	146, 341, 383, 984, 1000, 200, 387, 322, 448, 107, 751, 650, 205, 59	116	1000	65						1.87834e-08	2.9121	G	0.11039	0.0468696	A	0.343395	0.88961	0.95913	TF+DNaseI		2a	Likely to affect binding
STAT4	SNP1	2:191940451-SNV	2	191940451	rs7601754	G	?	?	?	?		STAT1, STAT4					0.00705528	0.767859	G	0.157827	0.196181	A	1.30232	0.842173	0.803819	FairfaxeQTL	Fairfax et al. 2014	5	TF binding or DNase peak
STAT4	SNP2	2:191943742-SNV	2	191943742	rs11889341	C	?	?	?	?					STAT1		4.81071e-09	1.65429	T	0.32859	0.228299	C	0.604488	0.67141	0.771701	eQTL in our panel	Our unpublished data	5	TF binding or DNase peak
STAT4	SNP3	2:191946603-SNV	2	191946603	rs13010752	T	?	?	c-6	718							0.01551	0.808822	A	0.0808538	0.0980903	T	1.23637	0.919146	0.90191	DNaseI		5	TF binding or DNase peak
STAT4	SNP4	2:191953389-SNV	2	191953389	rs12990918	C	?	?	?	?		STAT1, NAB1					0.0487141	0.86013	T	0.0886158	0.101562	C	1.16262	0.911384	0.898438	FairfaxeQTL	Fairfax et al. 2014	6	Motif hit
STAT4	SNP5	2:191953998-SNV	2	191953998	rs12612769	A	?	?	?	?							5.17316e-10	1.68909	C	0.288486	0.193576	A	0.592034	0.711514	0.806424	Peak SNP		6	Motif hit
STAT4	SNP6	2:191964633-SNV	2	191964633	rs7574865	T	?	?	?	?							4.92673e-09	1.64558	T	0.331177	0.231304	G	0.607687	0.668823	0.768696	Genomewide +GWAS		7	Histone mark/Eqtl
STAT4	SNP7	2:191968420-SNV	2	191968420	rs13407419	T	?	?	?	?		STAT4					0.0448028	0.66559	G	0.0597222	0.0871143	T	1.50243	0.940278	0.912886	FairfaxeQTL	Fairfax et al. 2014	7	Histone mark/Eqtl
STAT4	SNP8	2:191969879-SNV	2	191969879	rs10181656	G	CTCF	145	?	?							2.67441e-09	1.66366	G	0.336352	0.233507	C	0.601085	0.663648	0.766493	TF +GWAS		4	TF binding +DNase peak
STAT4	SNP9	2:191970120-SNV	2	191970120	rs7582694	C	ESR1, FOS	150, 440	c-28	392							1.72172e-09	1.67816	C	0.338292	0.233507	G	0.595889	0.661708	0.766493	TF+DN +GWAS		4	TF binding +DNase peak
BANK1	SNP1	4:102717916-SNV	4	102717916	rs67800004	A	POLR2A	180	?	?							0.00136912	0.799801	T	0.258732	0.303819	A	1.25031	0.741268	0.696181	TF		3a	Less likely to affect binding
BANK1	SNP2	4:102718100-SNV	4	102718100	rs17031641	T	POLR2A	180	c-2	151							0.00394039	0.814888	C	0.264896	0.30662	T	1.22716	0.735104	0.69338	TF+DN		4	TF binding +DNase peak
BANK1	SNP3	4:102725298-SNV	4	102725298	rs4699260	C	?	?	?	?							8.54999e-06	0.671106	T	0.203752	0.276042	C	1.49008	0.796248	0.723958	Peak SNP		6	Motif hit
BANK1	SNP4	4:102735513-SNV	4	102735513	rs4572885	T	YY1	190	?	?							0.00784374	0.777527	A	0.335058	0.393229	T	1.28613	0.664942	0.606771	TF		5	TF binding or DNase peak
BANK1	SNP5	4:102739452-SNV	4	102739452	rs35388091	C	EP300, GATA3	165, 448	?	?							0.00164154	0.795897	T	0.253558	0.29913	C	1.25644	0.746442	0.70087	TF		3a	Less likely to affect binding
BANK1	SNP6	4:102739536-SNV	4	102739536	rs1421627	G	GATA3	448	?	?							0.00183754	0.798453	A	0.252911	0.297743	G	1.25242	0.747089	0.702257	TF		2b	Likely to affect binding
BANK1	SNP7	4:102739791-SNV	4	102739791	rs13106926	A	RUNX3	464	c-34	954							0.00132266	0.790274	G	0.25097	0.297743	A	1.26538	0.74903	0.702257	TF+DN		2b	Likely to affect binding
BANK1	SNP8	4:102741002-SNV	4	102741002	rs71597109	C	?	?	c-8	242							0.000382515	0.776208	T	0.248383	0.298611	C	1.28831	0.751617	0.701389	DNaseI		5	TF binding or DNase peak
BANK1	SNP9	4:102751076-SNV	4	102751076	rs10516487	G	?	?	?	?						Coding	0.000548378	0.790836	A	0.250323	0.296875	G	1.26448	0.749677	0.703125	Coding +GWAS		7	Histone mark/Eqtl
BANK1	SNP10	4:102751276-SNV	4	102751276	rs10516486	C	?	?	?	?						Coding	0.0221155	0.802627	T	0.342173	0.393229	C	1.24591	0.657827	0.606771	Coding		7	Histone mark/Eqtl
BANK1	SNP11	4:102753408-SNV	4	102753408	rs4637409	A	?	?	c-5	288							0.000345307	0.778366	G	0.249677	0.299479	A	1.28474	0.750323	0.700521	DNaseI		5	TF binding or DNase peak
BANK1	SNP12	4:102756731-SNV	4	102756731	rs13129744	T	JUN, EP300, JUND, STAT3, CEBPB, RAD21	142, 251, 222, 690, 1000, 145	c-67	1000							0.000251156	0.766313	C	0.232212	0.282986	T	1.30495	0.767788	0.717014	TF+DN		4	TF binding +DNase peak
BANK1	SNP13	4:102772025-SNV	4	102772025	rs34397140	G	RELA	326	c-3	155							0.039972	1.12273	A	0.0782665	0.0703125	G	0.890687	0.921734	0.929688	TF+DN		4	TF binding +DNase peak
BANK1	SNP14	4:102772065-SNV	4	102772065	rs12501163	C	RELA	326	c-3	155							0.0125476	1.15246	T	0.084088	0.0737847	C	0.86771	0.915912	0.926215	TF+DN		3a	Less likely to affect binding
BANK1	SNP15	4:102774964-SNV	4	102774964	rs1421624	G	?	?	c-21	284							0.0331075	1.12273	A	0.0782665	0.0703125	G	0.890687	0.921734	0.929688	DNaseI		5	TF binding or DNase peak
BANK1	SNP16	4:102786729-SNV	4	102786729	rs35618358	G	EP300, TCF12	1000	c-49	841							0.0307403	1.1328	A	0.0789133	0.0703125	G	0.882766	0.921087	0.929688	TF+DN		2b	Likely to affect binding
BANK1	SNP17	4:102807062-SNV	4	102807062	rs13135361	A	MYBL2, ZNF217, EP300, TCF12, NFIC, ARID3A, TEAD4, FOSL2, ESR1, HDAC2, STAT3, JUN, NR3C1, ZBTB33, CEBPD, JUND, GATA3, MAFF, MYC, CEBPB, MAFK, FOXA1, FOXA2	275, 293, 453, 319, 268, 179, 240, 296, 330, 189, 260, 180, 861, 140, 107, 391, 387, 412, 1000, 513	c-18	562							0.0348231	1.1328	G	0.0789133	0.0703125	A	0.882766	0.921087	0.929688	TF+DN		4	TF binding +DNase peak
BANK1	SNP18	4:102807200-SNV	4	102807200	rs13111489	T	MYBL2, ZNF217, EP300, TCF12, NFIC	275, 293, 453, 319, 268	?	?							0.0348231	1.1328	C	0.0789133	0.0703125	T	0.882766	0.921087	0.929688	TF		5	TF binding or DNase peak
BANK1	SNP19	4:102837602-SNV	4	102837602	rs71597114	T	ESR1, GATA3, EP300	903, 235, 227	?	?							0.014585	1.20675	A	0.0795602	0.0668403	T	0.828671	0.92044	0.93316	TF		5	TF binding or DNase peak
BANK1	SNP20	4:102854390-SNV	4	102854390	rs17208914	A	?	?	?	?		SLC39A8					0.0215457	1.2106	G	0.507762	0.460069	A	0.826039	0.492238	0.539931	FairfaxeQTL +GWAS	Fairfax et al. 2014	6	Motif hit
BANK1	SNP21	4:102877371-SNV	4	102877371	rs62322693	G	?	?	c-11	433							0.0248264	1.15918	A	0.0756792	0.0659722	G	0.862676	0.924321	0.934028	DNaseI		5	TF binding or DNase peak
BANK1	SNP22	4:102889542-SNV	4	102889542	rs2631243	A	FOSL2, EP300, TCF12, STAT3, NR3C1	222, 876, 408, 226, 116	?	?							0.0212115	1.18065	T	0.0769728	0.0659722	A	0.84699	0.923027	0.934028	TF		4	TF binding +DNase peak
BANK1	SNP23	4:102898616-SNV	4	102898616	rs2631241	G	BCL3, POLR2A, RFX5, TBP, GTF2F1, GATA2, RAD21, MAX, RCOR1, JUN, SIN3AK20, EP300, MYC, CHD2, STAT3, FOSL2, JUND, CEBPB, USF1, TCF12, NR3C1, STAT1, REST, SMC3, USF2, FOS	299, 481, 458, 106, 138, 196, 349, 466, 195, 479, 246, 1000, 607, 211, 858, 518, 200, 581, 166, 206, 151, 267, 228	?	?							0.0185817	1.19141	G	0.0776197	0.0659722	A	0.839343	0.92238	0.934028	TF		2b	Likely to affect binding
BANK1	SNP24	4:102910832-SNV	4	102910832	rs2850376	C	ESR1, NR3C1	833, 176	?	?							0.0276076	1.16529	G	0.0790155	0.0685764	C	0.858158	0.920984	0.931424	TF		4	TF binding +DNase peak
TNIP1	SNP1	5:150425032-SNV	5	150425032	rs62382335	T	?	?									6.41903e-05	1.37	A	0.137775	0.104167	T	0.73	0.862225	0.895833	Peak SNP		6	Motif hit
TNIP1	SNP2	5:150438477-SNV	5	150438477	rs4958880	C	POLR2A	159	c-41	480							0.00526853	1.18071	A	0.274903	0.243056	C	0.846951	0.725097	0.756944	TF+DN		4	TF binding +DNase peak
TNIP1	SNP3	5:150438988-SNV	5	150438988	rs1422673	C	NR3C1, CTCF, RAD21, SMC3, MTA3	172, 430, 165, 163, 478	c-41	480	Hsmm						0.00403657	1.18806	T	0.274256	0.241319	C	0.841706	0.725744	0.758681	TF+DN+Histone		2b	Likely to affect binding
TNIP1	SNP4	5:150439539-SNV	5	150439539	rs3805431	G	MTA3, ZZZ3, IKZF1, PML, NFATC1, IRF4, FOXM1, FOSL2, RELA, POLR2A, BCL3, EBF1, PAX5, RUNX3, FOS, ATF2, BHLHE40, BATF, STAT3, STAT5A, NFIC, CEBPB	478, 1000, 239, 369, 317, 230, 218, 407, 275, 250, 186, 233, 484, 470, 341, 375, 560, 232, 292, 262	c-72	1000	Hsmm						0.000354113	1.36956	A	0.127426	0.0963542	G	0.73016	0.872574	0.903646	TF+DN+Histone		4	TF binding +DNase peak
TNIP1	SNP5	5:150442829-SNV	5	150442829	rs4958436	T	TFAP2A, POLR2A, TCF12, EP300, TFAP2C, ATF3, TCF7L2, JUNB, FOS, GATA2, MAFK, TEAD4, JUND, JUN, BACH1, NR2F2, TBL1XR1, FOSL2, MEF2A, RCOR1, MAFF	131, 339, 346, 365, 187, 201, 320, 146, 850, 235, 787, 253, 653, 458, 193, 515, 450, 945, 752, 486, 796	c-90	1000	Hsmm						0.00344615	1.18045	C	0.283312	0.250868	T	0.847135	0.716688	0.749132	TF+DN+Histone		4	TF binding +DNase peak
TNIP1	SNP6	5:150443005-SNV	5	150443005	rs17728260	A	TFAP2A, POLR2A, TCF12, EP300, TFAP2C, ATF3, TCF7L2, JUNB, FOS, GATA2, MAFK, TEAD4, JUND, JUN, BACH1, NR2F2, TBL1XR1, FOSL2, MEF2A, RCOR1, MAFF, FOSL1, NFE2	131, 339, 346, 365, 187, 201, 320, 146, 850, 235, 787, 253, 653, 458, 193, 515, 450, 945, 752, 486, 796, 168, 173	c-90	1000	Hsmm						0.000611897	1.30775	G	0.135188	0.106771	A	0.764671	0.864812	0.893229	TF+DN+Histone		4	TF binding +DNase peak
TNIP1	SNP7	5:150445609-SNV	5	150445609	rs1422674	T	NFIC, RUNX3, WRNIP1	282, 469, 128	?	?							0.000259363	1.32027	G	0.141656	0.111111	T	0.75742	0.858344	0.888889	TF		5	TF binding or DNase peak
TNIP1	SNP8	5:150458146-SNV	5	150458146	rs10036748	C	POLR2A, MEF2A, TBL1XR1, BHLHE40, EBF1, TBP, PML, POU2F2, MTA3, RELA, STAT5A	1000, 132, 203, 475, 191, 139, 356, 611, 359, 482, 322	c-9	1000	Hsmm			TNIP1, ANXA6			0.00529037	1.15825	T	0.331177	0.299479	C	0.863368	0.668823	0.700521	TF+DN+Histone +GWAS+eQTL	Westra et al., 2013	3a	Less likely to affect binding
TNIP1	SNP9	5:150460768-SNV	5	150460768	rs4958437	T	POLR2A, MXI1, MAX, CTCF, TBP, E2F1, ZBTB7A, NRF1, SIN3A, PHF8, RBBP5, TAF1, CHD1, SMARCB1, GABPA, CTCFL, ETS1, UBTF, CTBP2, TFAP2A, MAZ, HMGN3, NR3C1, TCF12, CCNT2, RELA, ELF1, PML, CHD2, NFIC, YY1, IRF1, E2F6, GATA1, SP2, CREB1, NFYA, SP1, SPI1, MYC, NFYB, POU2F2, SIN3AK20, E2F4, FOXP2, TBL1XR1, PBX3, BHLHE40, PAX5, RFX5, RCOR1, ZBTB33, REST, RUNX3, MYBL2, ELK1, KDM5B, TCF3, FOXA1, JUND, FOS, FO…	1000, 308, 517, 342, 153, 355, 394, 354, 368, 792, 274, 257, 846, 243, 142, 399, 151, 223, 522, 276, 141, 241, 496, 568, 460, 192, 272, 175, 205, 719, 238, 654, 478, 503, 280, 827, 230, 229, 417, 189, 561, 242, 172, 159, 184, 117, 160, 275, 300, 398, 261, 925, 210, 514, 510, 171	c-123	1000	Hsmm						0.000600278	1.28714	C	0.144562	0.116056	T	0.776918	0.855438	0.883944	TF+DN+Histone		4	TF binding +DNase peak
HLA-DRB1 (signal3)	SNP1	6:32550431-SNV	6	32550431	rs36101847	C	?	?	?	?							8.32766e-09	0.485959	T	0.126779	0.230035	C	2.05778	0.873221	0.769965	Genomewide		6	Motif hit
HLA-DRB1 (signal3)	SNP2	6:32552462-SNV	6	32552462	rs114660984	C	POLR2A, ZNF263, STAT5A, CTCF, SIN3A	556, 542, 298, 886, 189, 359	?	?							0.000838246	0.590435	T	0.0698577	0.112847	C	1.69367	0.930142	0.887153	TF		3a	Less likely to affect binding
HLA-DRB1 (signal3)	SNP3	6:32552603-SNV	6	32552603	rs113342592	C	POLR2A	556	?	?							0.00128888	0.616445	G	0.0692109	0.107639	C	1.6222	0.930789	0.892361	TF		4	TF binding +DNase peak
HLA-DRB1 (signal3)	SNP4	6:32552641-SNV	6	32552641	rs28724139	C	POLR2A	556	?	?							0.000278161	0.601606	T	0.0756792	0.119792	C	1.66222	0.924321	0.880208	TF		4	TF binding +DNase peak
HLA-DRB1 (signal3)	SNP5	6:32553706-SNV	6	32553706	rs34491087	T	POLR2A	367	?	?							0.00150345	0.592502	C	0.0707792	0.113913	T	1.68776	0.929221	0.886087	TF		5	TF binding or DNase peak
HLA-DRB1 (signal3)	SNP6	6:32553729-SNV	6	32553729	rs35092298	C	POLR2A	367	?	?							0.000879764	0.602207	T	0.0711514	0.112847	C	1.66056	0.928849	0.887153	TF		4	TF binding +DNase peak
HLA-DRB1 (signal3)	SNP7	6:32553767-SNV	6	32553767	rs115920156	A	POLR2A	367	?	?							0.000435692	0.571945	G	0.0672704	0.111979	A	1.74842	0.93273	0.888021	TF		4	TF binding +DNase peak
HLA-DRB1 (signal3)	SNP8	6:32553792-SNV	6	32553792	rs34593373	T	POLR2A	367	c-3	210							0.000957697	0.580351	C	0.0698577	0.114583	T	1.72309	0.930142	0.885417	TF+DN		3a	Less likely to affect binding
HLA-DRB1 (signal3)	SNP9	6:32553799-SNV	6	32553799	rs35577188	T	POLR2A	367	c-3	210							0.000288976	0.547339	A	0.0640362	0.111111	T	1.82702	0.935964	0.888889	TF+DN		3a	Less likely to affect binding
HLA-DRB1 (signal3)	SNP10	6:32553800-SNV	6	32553800	rs34767482	G	POLR2A	367	c-3	210							3.77412e-05	0.57503	A	0.100259	0.162326	G	1.73904	0.899741	0.837674	TF+DN		3a	Less likely to affect binding
HLA-DRB1 (signal3)	SNP11	6:32553801-SNV	6	32553801	rs35252757	G	POLR2A	367	c-3	210							0.000288976	0.547339	A	0.0640362	0.111111	G	1.82702	0.935964	0.888889	TF+DN		3a	Less likely to affect binding
HLA-DRB1 (signal3)	SNP12	6:32553841-SNV	6	32553841	rs72850287	A	POLR2A	367	c-3	210							0.00121434	0.597719	C	0.0717982	0.114583	A	1.67303	0.928202	0.885417	TF+DN		4	TF binding +DNase peak
HLA-DRB1 (signal3)	SNP13	6:32554719-SNV	6	32554719	rs72850296	T	CHD1	186	?	?							0.00018381	0.534941	C	0.0549806	0.0980903	T	1.86937	0.945019	0.90191	TF		3a	Less likely to affect binding
HLA-DRB1 (signal3)	SNP14	6:32554762-SNV	6	32554762	rs114856598	C	CHD1	186	?	?							0.0002257	0.546809	T	0.0582147	0.101562	C	1.82879	0.941785	0.898438	TF		3a	Less likely to affect binding
HLA-DRB1 (signal3)	SNP15	6:32561390-SNV	6	32561390	rs9270589	C	?	?	?	?			HLA-DRB5				0.000788654	1.41547	T	0.465674	0.381076	C	0.70648	0.534326	0.618924	RajeQTL	Raj et al 2014	5	TF binding or DNase peak
HLA-DRB1 (signal3)	SNP16	6:32561392-SNV	6	32561392	rs74194285	G	?	?	?	?			HLA-DRB5				0.000704962	1.41916	A	0.466321	0.381076	G	0.704644	0.533679	0.618924	RajeQTL	Raj et al 2014	7	Histone mark/Eqtl
HLA-DRB1 (signal3)	SNP17	6:32561445-SNV	6	32561445	rs74196378	A	?	?	?	?			HLA-DRB5				0.00170391	1.35838	G	0.466365	0.391493	A	0.736168	0.533635	0.608507	RajeQTL	Raj et al 2014	6	Motif hit
HLA-DRB1 (signal3)	SNP18	6:32561551-SNV	6	32561551	rs28366320	G	?	?	?	?			HLA-DQB1				1.19919e-05	0.678678	A	0.357513	0.450521	G	1.47345	0.642487	0.549479	RajeQTL	Raj et al 2014	6	Motif hit
HLA-DRB1 (signal3)	SNP19	6:32561693-SNV	6	32561693	rs74201466	C	?	?	?	?			HLA-DRB5				0.000822351	1.45768	T	0.298189	0.225694	C	0.686021	0.701811	0.774306	RajeQTL	Raj et al 2014	7	Histone mark/Eqtl
HLA-DRB1 (signal3)	SNP20	6:32565940-SNV	6	32565940	rs9270653	G	?	?	?	?			HLA-DRB5				0.000952646	1.33043	A	0.395725	0.329861	G	0.751635	0.604275	0.670139	RajeQTL	Raj et al 2014	5	TF binding or DNase peak
HLA-DRB1 (signal3)	SNP21	6:32565946-SNV	6	32565946	rs9270654	T	?	?	?	?			HLA-DRB5				0.00125224	1.324	G	0.398316	0.333333	T	0.755285	0.601684	0.666667	RajeQTL	Raj et al 2014	5	TF binding or DNase peak
HLA-DRB1 (signal3)	SNP22	6:32566089-SNV	6	32566089	rs9270662	T	?	?	?	?			HLA-DRB5				0.000506843	1.47502	G	0.289133	0.216146	T	0.677956	0.710867	0.783854	RajeQTL	Raj et al 2014	5	TF binding or DNase peak
HLA-DRB1 (signal3)	SNP23	6:32566101-SNV	6	32566101	rs114272126	A	?	?	?	?			HLA-DRB5				0.00120535	1.34674	G	0.408031	0.338542	A	0.742532	0.591969	0.661458	RajeQTL	Raj et al 2014	5	TF binding or DNase peak
HLA-DRB1 (signal3)	SNP24	6:32566232-SNV	6	32566232	rs113830398	G	?	?	?	?		LOC642073, ATF6B, PSMB9, TAP2, APOM, HLA-DPB1, TAP1, CLIC1	HLA-DRB5				0.000709508	1.46135	T	0.296632	0.223958	G	0.6843	0.703368	0.776042	FairfaxeQTL+ RajeQTL	Fairfax et al. 2014	6	Motif hit
HLA-DRB1 (signal3)	SNP25	6:32566294-SNV	6	32566294	rs76814702	T	?	?	?	?	2						0.000576846	1.47699	C	0.301423	0.226087	T	0.677051	0.698577	0.773913	Histone marks		7	Histone mark/Eqtl
HLA-DRB1 (signal3)	SNP26	6:32567065-SNV	6	32567065	rs111665670	G	KAP1	338	?	?			HLA-DQA1				0.00100715	0.541236	A	0.0679825	0.118762	G	1.84762	0.932018	0.881238	TF +eQTL	Raj et al 2014	5	TF binding or DNase peak
HLA-DRB1 (signal3)	SNP27	6:32569513-SNV	6	32569513	rs28567460	G	?	?	?	?			HLA-DQA1				0.00156146	0.610943	C	0.0719947	0.112676	G	1.63681	0.928005	0.887324	RajeQTL	Raj et al 2014	7	Histone mark/Eqtl
HLA-DRB1 (signal3)	SNP28	6:32569687-SNV	6	32569687	rs28605404	A	?	?	?	?		LOC642073, HLA-DOB, TAP2, HSD17B8, HSPA1B	HLA-DQA1				0.000796178	0.586133	G	0.0705045	0.114583	A	1.7061	0.929495	0.885417	FairfaxeQTL+ RajeQTL	Fairfax et al. 2014	6	Motif hit
XL9 (signal1)	SNP1	6:32566284-SNV	6	32566284	rs4343959	T	?	?	?	?		?	HLA-DQA1	?			7.84858e-05	0.523215	A	0.0608808	0.110243	T	1.91126	0.939119	0.889757	Eqtl	Raj et al., 2014	7	Histone mark/Eqtl
XL9 (signal1)	SNP2	6:32566947-SNV	6	32566947	rs113147629	C	KAP1	338	?	?		?	HLA-DQA1	?			5.04605e-05	0.520098	T	0.0676856	0.12249	C	1.92271	0.932314	0.87751	TF+eQTL		5	TF binding or DNase peak
XL9 (signal1)	SNP3	6:32573539-SNV	6	32573539	rs111304709	G	?	?	?	?		?	HLA-DQA2, HLA-DRB5	?			4.94736e-05	1.59014	C	0.291721	0.205729	G	0.628876	0.708279	0.794271	Eqtl	Raj et al., 2014	5	TF binding or DNase peak
XL9 (signal1)	SNP4	6:32576265-SNV	6	32576265	rs34811813	G	POLR2A, RELA, EGR1, BATF, TBP, TAF1, EBF1, RFX5, CTCF	827, 293, 239, 372, 424, 188, 214, 265, 329, 154, 801	c-7	295		?	HLA-DQA1, HLA-DQB1	?			0.000436357	0.585355	T	0.0698577	0.113715	G	1.70837	0.930142	0.886285	TF+DN+eQTL	Raj et al., 2014	3a	Less likely to affect binding
XL9 (signal1)	SNP5	6:32576283-SNV	6	32576283	rs113472207	G	POLR2A, TBP, RELA, RFX5, CTCF	827, 265, 329, 154, 801	c-7	295		?	?	?			0.000560871	0.585355	A	0.0698577	0.113715	G	1.70837	0.930142	0.886285	TF+DN		4	TF binding +DNase peak
XL9 (signal1)	SNP6	6:32576324-SNV	6	32576324	rs36202959	C	POLR2A, TBP, RELA, RFX5, CTCF	827, 265, 329, 154, 801	c-7	295		?	HLA-DQA1, HLA-DQB1	?			0.000164033	0.542566	G	0.0640362	0.111979	C	1.84309	0.935964	0.888021	TF+DN+eQTL	Raj et al., 2014	3a	Less likely to affect binding
XL9 (signal1)	SNP7	6:32576341-SNV	6	32576341	rs9271093	G	TBP, RELA, RFX5, CTCF	265, 329, 154, 801	c-7	295		?	HLA-DQA1, HLA-DQB1, HLA-DQB2, HLA-DRB5	?			0.000856806	1.42042	G	0.211514	0.158854	A	0.704017	0.788486	0.841146	TF+DN+eQTL	Raj et al., 2014	3a	Less likely to affect binding
XL9 (signal1)	SNP8	6:32576356-SNV	6	32576356	rs35515288	T	TBP, RELA, RFX5, CTCF	265, 329, 154, 801	c-7	295		?	HLA-DQA1, HLA-DQB1	?			0.000512985	0.576649	C	0.0673575	0.111304	T	1.73416	0.932642	0.888696	TF+DN+eQTL	Raj et al., 2014	4	TF binding +DNase peak
XL9 (signal1)	SNP9	6:32576368-SNV	6	32576368	rs36202958	C	TBP, RELA, RFX5, CTCF	265, 329, 154, 801	c-7	295		?	HLA-DQA1, HLA-DQB1	?			0.000863897	0.589336	T	0.0693005	0.112174	C	1.69682	0.930699	0.887826	TF+DN+eQTL	Raj et al., 2014	3a	Less likely to affect binding
XL9 (signal1)	SNP10	6:32577417-SNV	6	32577417	rs111463829	T	POLR2A, BCLAF1, IKZF1	1000, 227, 482	?	?		?	HLA-DQA1, HLA-DQB1	?			0.000343671	0.58116	G	0.0699482	0.114583	T	1.7207	0.930052	0.885417	TF+eQTL		3a	Less likely to affect binding
XL9 (signal1)	SNP11	6:32577633-SNV	6	32577633	rs535777	G	POLR2A, BCLAF1, IKZF1, POU2F2, TBP, EBF1, PML, STAT1, TAF1, RELA, RFX5, KAP1, SPI1, CHD2, ZNF263, NFYA, NFYB, TEAD4, GTF2F1, FOXM1, USF2, CREB1, FOS, EP300, ZNF143, GATA1, BHLHE40	1000, 227, 482, 297, 934, 281, 466, 391, 552, 170, 376, 249, 967, 492, 273, 308, 263, 113, 804, 390, 335, 217, 329	c-120	1000		?	HLA-DQA2, HLA-DQB1, HLA-DRB5	?			4.16493e-05	1.68889	C	0.18564	0.118924	G	0.592104	0.81436	0.881076	TF+DN+eQTL	Raj et al., 2014	2b	Likely to affect binding
XL9 (signal1)	SNP12	6:32582969-SNV	6	32582969	rs112627226	T	?	?	?	?		?	HLA-DQA1	?			1.07233e-05	0.483396	C	0.0518135	0.101562	T	2.0687	0.948187	0.898438	Eqtl	Raj et al., 2014	7	Histone mark/Eqtl
XL9 (signal1)	SNP13	6:32583757-SNV	6	32583757	rs113711404	G	CTCF	555	?	?		?	HLA-DQA1, HLA-DQA2	?			0.000230256	0.542695	A	0.0661972	0.115534	G	1.84266	0.933803	0.884466	TF+eQTL		4	TF binding +DNase peak
XL9 (signal1)	SNP14	6:32583831-SNV	6	32583831	rs114822165	G	CTCF	555	?	?		?	HLA-DQA2, HLA-DQB1, HLA-DRB5	?			2.50215e-05	1.90334	C	0.1983	0.11501	G	0.525393	0.8017	0.88499	TF+eQTL		4	TF binding +DNase peak
XL9 (signal1)	SNP15	6:32583846-SNV	6	32583846	rs113568421	G	CTCF	555	?	?		?	HLA-DQA1, HLA-DQA2	?			0.00132299	0.544809	A	0.0633001	0.110352	G	1.83551	0.9367	0.889648	TF+eQTL		3a	Less likely to affect binding
XL9 (signal1)	SNP16	6:32583860-SNV	6	32583860	rs112392119	C	CTCF	555	?	?		?	HLA-DQA1, HLA-DQB1, HLA-DQB2, HLA-DRB5	?			0.0473563	1.19998	C	0.166193	0.142442	G	0.833348	0.833807	0.857558	TF+eQTL		4	TF binding +DNase peak
XL9 (signal1)	SNP17	6:32583938-SNV	6	32583938	rs113305639	T	CTCF	555	?	?		?	HLA-DQA2, HLA-DQB1, HLA-DRB5	?			0.00990013	1.42063	C	0.296575	0.22886	T	0.703915	0.703425	0.77114	TF+eQTL		5	TF binding or DNase peak
XL9 (signal1)	SNP18	6:32584014-SNV	6	32584014	rs78027852	T	CTCF	555	?	?		?	HLA-DQA1, HLA-DQB1, HLA-DQB2, HLA-DRB5	?			0.0108996	1.29892	T	0.172751	0.138502	C	0.769869	0.827249	0.861498	TF+eQTL		3a	Less likely to affect binding
XL9 (signal1)	SNP19	6:32584088-SNV	6	32584088	rs116071069	T	?	?	?	?		?	HLA-DQB1	?			1.73283e-06	1.54944	T	0.510996	0.402778	C	0.645393	0.489004	0.597222	Eqtl	Raj et al., 2014	5	TF binding or DNase peak
XL9 (signal1)	SNP20	6:32584099-SNV	6	32584099	rs28383231	C	?	?	?	?		?	HLA-DQB1	?			2.25072e-06	1.54144	C	0.509702	0.402778	T	0.648743	0.490298	0.597222	Eqtl	Raj et al., 2014	5	TF binding or DNase peak
XL9 (signal1)	SNP21	6:32584153-SNV	6	32584153	rs112605168	G	?	?	?	?		?	HLA-DQB1	?			2.29122e-06	1.54302	G	0.509056	0.40191	A	0.64808	0.490944	0.59809	Eqtl	Raj et al., 2014	5	TF binding or DNase peak
XL9 (signal1)	SNP22	6:32587213-SNV	6	32587213	rs28383314	T	?	?	?	?		?	HLA-DQB1, HLA-DRB5	?			2.22607e-06	1.55811	T	0.482456	0.374332	C	0.641803	0.517544	0.625668	Eqtl	Raj et al., 2014	7	Histone mark/Eqtl
XL9 (signal1)	SNP23	6:32589065-SNV	6	32589065	rs78823360	A	POLR2A	1000	?	?		?	?	?			2.55078e-05	0.514711	G	0.0575679	0.106087	A	1.94284	0.942432	0.893913	TF		5	TF binding or DNase peak
XL9 (signal1)	SNP24	6:32590154-SNV	6	32590154	rs9271546	T	POLR2A, ZNF263	1000, 275	c-60	1000		?	HLA-DQB1	?			2.34088e-07	0.654265	C	0.411384	0.516493	T	1.52843	0.588616	0.483507	TF+DN+eQTL	Raj et al., 2014	4	TF binding +DNase peak
XL9 (signal1)	SNP25	6:32590159-SNV	6	32590159	rs9271547	C	POLR2A, ZNF263	1000, 275	c-60	1000		?	?	?			1.76608e-07	0.65252	A	0.410737	0.516493	C	1.53252	0.589263	0.483507	TF+DN		4	TF binding +DNase peak
XL9 (signal1)	SNP26	6:32590248-SNV	6	32590248	rs9271549	T	POLR2A, ZNF263, TAF1, WRNIP1, CTCF, YY1, RELA, RAD21, RFX5, IRF4	1000, 275, 320, 143, 254, 267, 638, 172	c-60	1000		?	HLA-DQB1	?			0.0050795	0.764824	C	0.266494	0.322049	T	1.30749	0.733506	0.677951	TF+DN+eQTL	Raj et al., 2014	2b	Likely to affect binding
XL9 (signal1)	SNP27	6:32590317-SNV	6	32590317	rs9271554	A	POLR2A, ZNF263, TAF1, WRNIP1, CTCF, YY1, RELA, RAD21, RFX5, IRF4, TBP, SMC3, TCF12, ZNF143	1000, 275, 320, 143, 254, 267, 638, 172, 154, 591, 142, 171	c-60	1000		?	HLA-DQB1	?			0.00449643	0.752709	G	0.250323	0.307292	A	1.32853	0.749677	0.692708	TF+DN+eQTL	Raj et al., 2014	4	TF binding +DNase peak
XL9 (signal1)	SNP28	6:32590363-Del	6	32590363	0	C	POLR2A, ZNF263, TAF1, WRNIP1, CTCF, YY1, RELA, RAD21, RFX5, IRF4, TBP, SMC3, TCF12, ZNF143, PAX5, TCF3, POU2F2, MAZ, MXI1	1000, 275, 320, 143, 254, 267, 638, 172, 154, 591, 142, 171, 206, 147, 829, 169, 238	c-60	1000		?	?	?			0.00499134	1.32442	C	0.179172	0.141493	-	0.755046	0.820828	0.858507	TF+DN		4	TF binding +DNase peak
XL9 (signal1)	SNP29	6:32590364-SNV	6	32590364	rs114993630	C	POLR2A, ZNF263, TAF1, WRNIP1, CTCF, YY1, RELA, RAD21, RFX5, IRF4, TBP, SMC3, TCF12, ZNF143, PAX5, TCF3, POU2F2, MAZ, MXI1	1000, 275, 320, 143, 254, 267, 638, 172, 154, 591, 142, 171, 206, 147, 829, 169, 238	c-60	1000		?	?	?			2.62552e-05	1.71999	T	0.19599	0.124132	C	0.581398	0.80401	0.875868	TF+DN		4	TF binding +DNase peak
XL9 (signal1)	SNP30	6:32590381-SNV	6	32590381	rs9271560	A	POLR2A, ZNF263, TAF1, WRNIP1, CTCF, YY1, RELA, RAD21, RFX5, IRF4, TBP, SMC3, TCF12, ZNF143, PAX5, TCF3, POU2F2, MAZ, MXI1, TBL1XR1	1000, 275, 320, 143, 254, 267, 638, 172, 154, 591, 142, 171, 206, 147, 829, 169, 238, 233	c-60	1000		?	HLA-DQB1	?			0.00419074	0.765808	T	0.257439	0.311632	A	1.30581	0.742561	0.688368	TF+DN+eQTL	Raj et al., 2014	4	TF binding +DNase peak
XL9 (signal1)	SNP31	6:32590393-SNV	6	32590393	rs74638570	T	POLR2A, ZNF263, TAF1, WRNIP1, CTCF, YY1, RELA, RAD21, RFX5, IRF4, TBP, SMC3, TCF12, ZNF143, PAX5, TCF3, POU2F2, MAZ, MXI1, TBL1XR1	1000, 275, 320, 143, 254, 267, 638, 172, 154, 591, 142, 171, 206, 147, 829, 169, 238, 233	c-60	1000		?	HLA-DQB1	?			0.0025794	0.760513	G	0.252264	0.307292	T	1.3149	0.747736	0.692708	TF+DN+eQTL	Raj et al., 2014	4	TF binding +DNase peak
XL9 (signal1)	SNP32	6:32590411-SNV	6	32590411	rs9271562	G	POLR2A, ZNF263, TAF1, WRNIP1, CTCF, YY1, RELA, RAD21, RFX5, IRF4, TBP, SMC3, TCF12, ZNF143, PAX5, TCF3, POU2F2, MAZ, MXI1, TBL1XR1, RUNX3, PML	1000, 275, 320, 143, 254, 267, 638, 172, 154, 591, 142, 171, 206, 147, 829, 169, 238, 233, 504	c-60	1000		0	0	0			0.0187434	1.32923	A	0.338292	0.277778	G	0.752317	0.661708	0.722222	TF+DN		1a	Likely to affect binding + Gene expression
XL9 (signal1)	SNP33	6:32590428-SNV	6	32590428	rs74818935	T	POLR2A, ZNF263, TAF1, WRNIP1, CTCF, YY1, RELA, RAD21, RFX5, IRF4, TBP, SMC3, TCF12, ZNF143, PAX5, TCF3, POU2F2, MAZ, MXI1, TBL1XR1, RUNX3, PML, BHLHE40, NFIC	1000, 275, 320, 143, 254, 267, 638, 172, 154, 591, 142, 171, 206, 147, 829, 169, 238, 233, 504, 263	c-60	1000		?	HLA-DQB1	?			0.00104078	0.751085	C	0.226391	0.280382	T	1.33141	0.773609	0.719618	TF+DN+eQTL	Raj et al., 2014	4	TF binding +DNase peak
XL9 (signal1)	SNP34	6:32590436-SNV	6	32590436	rs116253018	C	POLR2A, ZNF263, TAF1, WRNIP1, CTCF, YY1, RELA, RAD21, RFX5, IRF4, TBP, SMC3, TCF12, ZNF143, PAX5, TCF3, POU2F2, MAZ, MXI1, TBL1XR1, RUNX3, PML, BHLHE40, NFIC	1000, 275, 320, 143, 254, 267, 638, 172, 154, 591, 142, 171, 206, 147, 829, 169, 238, 233, 504, 263	c-60	1000		?	HLA-DQB1	?			0.0015655	0.733032	T	0.209573	0.265625	C	1.3642	0.790427	0.734375	TF+DN+eQTL	Raj et al., 2014	4	TF binding +DNase peak
XL9 (signal1)	SNP35	6:32590482-SNV	6	32590482	rs2395224	C	POLR2A, ZNF263, TAF1, WRNIP1, CTCF, YY1, RELA, RAD21, RFX5, IRF4, TBP, SMC3, TCF12, ZNF143, PAX5, TCF3, POU2F2, MAZ, MXI1, TBL1XR1, RUNX3, PML, BHLHE40, NFIC, USF2, SPI1	1000, 275, 320, 143, 254, 267, 638, 172, 154, 591, 142, 171, 206, 147, 829, 169, 238, 233, 504, 263, 127, 546	c-60	1000		?	HLA-DQA2, HLA-DQB1, HLA-DRB5	?			0.000941838	1.47021	G	0.303109	0.228299	C	0.680175	0.696891	0.771701	TF+DN+eQTL	Raj et al., 2014	4	TF binding +DNase peak
XL9 (signal1)	SNP36	6:32590483-SNV	6	32590483	rs111554896	C	POLR2A, ZNF263, TAF1, WRNIP1, CTCF, YY1, RELA, RAD21, RFX5, IRF4, TBP, SMC3, TCF12, ZNF143, PAX5, TCF3, POU2F2, MAZ, MXI1, TBL1XR1, RUNX3, PML, BHLHE40, NFIC, USF2, SPI1	1000, 275, 320, 143, 254, 267, 638, 172, 154, 591, 142, 171, 206, 147, 829, 169, 238, 233, 504, 263, 127, 546	c-60	1000		?	?	?			0.000748622	0.676826	T	0.181995	0.247396	C	1.47748	0.818005	0.752604	TF+DN		4	TF binding +DNase peak
XL9 (signal1)	SNP37	6:32590696-SNV	6	32590696	rs34629405	C	POLR2A, ZNF263, CTCF, RELA, MAZ, MXI1, TBL1XR1, RUNX3, PML, BHLHE40, NFIC, USF2, SPI1, NFATC1	1000, 275, 267, 169, 238, 233, 504, 263, 127, 546, 425	c-2	995		?	?	?			0.000810637	0.654113	T	0.109314	0.157986	C	1.52879	0.890686	0.842014	TF+DN		3a	Less likely to affect binding
XL9 (signal1)	SNP38	6:32590722-SNV	6	32590722	rs115355413	G	POLR2A, CTCF, MAZ, MXI1, TBL1XR1, RUNX3, PML, BHLHE40, NFIC, NFATC1	1000, 169, 238, 233, 504, 263, 425	c-2	995		LOC642073, HLA-DOB, TAP2, HSD17B8, HSPA1B	?	TAP2			0.00120808	0.662817	T	0.110608	0.157986	G	1.50871	0.889392	0.842014	TF+DN		4	TF binding +DNase peak
XL9 (signal1)	SNP39	6:32590735-SNV	6	32590735	rs74402093	C	POLR2A, CTCF, MAZ, MXI1, TBL1XR1, RUNX3, PML, BHLHE40, NFIC, NFATC1	1000, 169, 238, 233, 504, 263, 425	c-2	995		?	?	?			0.000278718	0.680655	T	0.153946	0.210938	C	1.46917	0.846054	0.789062	TF+DN		4	TF binding +DNase peak
XL9 (signal1)	SNP40	6:32590768-SNV	6	32590768	rs111955760	C	POLR2A, CTCF, MAZ, MXI1, TBL1XR1, RUNX3, PML, NFIC, NFATC1, RELA, ATF2	1000, 169, 238, 233, 504, 425, 312	c-2	995		?	?	?			0.045139	0.828962	A	0.0931436	0.110243	C	1.20633	0.906856	0.889757	TF+DN		3a	Less likely to affect binding
XL9 (signal1)	SNP41	6:32590771-SNV	6	32590771	rs2097432	T	POLR2A, CTCF, MAZ, MXI1, TBL1XR1, RUNX3, PML, NFIC, NFATC1, RELA, ATF2	1000, 169, 238, 233, 504, 425, 312	c-2	995		?	HLA-DQA2, HLA-DQB1, HLA-DRB5	TAP2, PSMB9			0.0030214	1.40149	C	0.298189	0.232639	T	0.713529	0.701811	0.767361	TF+DN+eQTL	Raj et al., 2014;Westra et al., 2013	3a	Less likely to affect binding
XL9 (signal1)	SNP42	6:32590774-SNV	6	32590774	rs9271582	T	POLR2A, CTCF, MAZ, MXI1, TBL1XR1, RUNX3, PML, NFIC, NFATC1, RELA, ATF2	1000, 169, 238, 233, 504, 425, 312	c-2	995		?	?	?			0.00637917	0.769022	C	0.241268	0.292535	T	1.30035	0.758732	0.707465	TF+DN		3a	Less likely to affect binding
XL9 (signal1)	SNP43	6:32590780-SNV	6	32590780	rs112372067	T	POLR2A, CTCF, MXI1, TBL1XR1, RUNX3, PML, NFIC, NFATC1, RELA, ATF2, EP300	1000, 238, 233, 504, 425, 312, 922	?	?		?	?	?			0.00262822	0.74743	C	0.236093	0.292535	T	1.33792	0.763907	0.707465	TF		2b	Likely to affect binding
XL9 (signal1)	SNP44	6:32590899-SNV	6	32590899	rs75959827	G	POLR2A, RUNX3, PML, NFIC, NFATC1, RELA, ATF2, EP300, MEF2C, FOXM1, MTA3, SP1, BCL11A, TBP, EZH2, BHLHE40, POU2F2, STAT5A, ETS1, NFYB, MEF2A	1000, 504, 425, 312, 922, 204, 766, 440, 242, 233, 291, 153, 318, 448, 108, 296, 370	c-37	1000		?	HLA-DQB1	TAP2			8.72197e-07	0.654963	T	0.371928	0.474826	G	1.5268	0.628072	0.525174	TF+DN+eQTL	Raj et al., 2014	1f	Likely to affect binding + Gene expression
XL9 (signal1)	SNP45	6:32590916-SNV	6	32590916	rs114631657	A	POLR2A, RUNX3, PML, NFIC, NFATC1, RELA, ATF2, EP300, MEF2C, FOXM1, MTA3, SP1, BCL11A, TBP, EZH2, BHLHE40, POU2F2, STAT5A, ETS1, NFYB, MEF2A	1000, 504, 425, 312, 922, 204, 766, 440, 242, 233, 291, 153, 318, 448, 108, 296, 370	c-37	1000		?	HLA-DQB1	?			1.1032e-06	0.656309	G	0.373221	0.475694	A	1.52367	0.626779	0.524306	TF+DN+eQTL	Raj et al., 2014	3a	Less likely to affect binding
XL9 (signal1)	SNP46	6:32590953-SNV	6	32590953	rs77447343	T	POLR2A, RUNX3, PML, NFIC, NFATC1, RELA, ATF2, EP300, MEF2C, FOXM1, MTA3, SP1, BCL11A, TBP, EZH2, BHLHE40, POU2F2, STAT5A, ETS1, NFYB, MEF2A	1000, 504, 425, 312, 922, 204, 766, 440, 242, 233, 291, 153, 318, 448, 108, 296, 370	c-37	1000		LOC642073, BAT3, PSMB9, PSMB8, DDAH2	HLA-DQB1	?			8.3759e-07	0.654496	C	0.372574	0.475694	T	1.52789	0.627426	0.524306	TF+DN+eQTL	Raj et al., 2014;Fairfax et al., 2014	1b	Likely to affect binding + Gene expression
XL9 (signal1)	SNP47	6:32591138-SNV	6	32591138	rs9271590	G	RUNX3, PML, NFIC, NFATC1, RELA, ATF2, EP300, TBP, EZH2, BHLHE40, POU2F2, NFYB, RFX5	1000, 504, 425, 312, 922, 291, 153, 318, 296	c-37	1000		?	?	?			1.89725e-06	0.66001	A	0.371281	0.472222	G	1.51513	0.628719	0.527778	TF+DN		2b	Likely to affect binding
XL9 (signal1)	SNP48	6:32591141-SNV	6	32591141	rs114846898	G	RUNX3, PML, NFIC, NFATC1, RELA, ATF2, EP300, TBP, EZH2, BHLHE40, POU2F2, NFYB, RFX5	1000, 504, 425, 312, 922, 291, 153, 318, 296	c-37	1000		?	HLA-DQB1	?			9.77512e-07	0.655429	A	0.371281	0.473958	G	1.52572	0.628719	0.526042	TF+DN+eQTL	Raj et al., 2014	1b	Likely to affect binding + Gene expression
XL9 (signal1)	SNP49	6:32591198-SNV	6	32591198	rs9271593	C	NFATC1, NFYB, RFX5	425, 296, 1000	?	?		?	?	?			6.50443e-10	1.69104	C	0.548701	0.418261	T	0.591353	0.451299	0.581739	TF		4	TF binding +DNase peak
XL9 (signal1)	SNP50	6:32591777-SNV	6	32591777	rs79295810	G	NFIC, TBL1XR1, POLR2A, CHD2, RELA, IRF4, RFX5, RUNX3, POU2F2, BCL11A, SPI1, TAF1	224, 183, 809, 171, 209, 345, 215, 1000, 274, 169, 174	?	?		?	HLA-DQB1	?			9.55106e-07	0.657247	T	0.371928	0.473958	G	1.5215	0.628072	0.526042	TF+eQTL		4	TF binding +DNase peak
XL9 (signal1)	SNP51	6:32592219-SNV	6	32592219	rs9271642	A	?	?	?	?		?	HLA-DQB1	?			1.70313e-09	1.62822	A	0.539457	0.418403	G	0.614167	0.460543	0.581597	Eqtl	Raj et al., 2014	7	Histone mark/Eqtl
XL9 (signal1)	SNP52	6:32594061-SNV	6	32594061	rs9271763	A	?	?	?	?		?	HLA-DQB1, HLA-DRB5	?			3.30933e-06	0.662784	G	0.370634	0.470486	A	1.50879	0.629366	0.529514	Eqtl	Raj et al., 2014	5	TF binding or DNase peak
XL9 (signal1)	SNP53	6:32595042-SNV	6	32595042	rs112074947	G	POLR2A, EBF1	296, 414	?	?		?	?	?			2.44862e-05	0.48672	T	0.0549806	0.106771	G	2.05457	0.945019	0.893229	TF		5	TF binding or DNase peak
XL9 (signal1)	SNP54	6:32609594-SNV	6	32609594	rs9272729	G	POLR2A	827	?	?		?	?	?			2.88476e-05	1.71098	A	0.188875	0.119792	G	0.584461	0.811125	0.880208	TF		5	TF binding or DNase peak
XL9 (signal1)	SNP55	6:32610134-SNV	6	32610134	rs75076975	G	POLR2A	827	?	?		?	?	?			0.000320528	0.715913	A	0.256792	0.325521	G	1.39682	0.743208	0.674479	TF		5	TF binding or DNase peak
XL9 (signal1)	SNP56	6:32626484-SNV	6	32626484	rs9273369	T	POLR2A, SPI1, TAF1, PAX5, POU2F2	933, 157, 155, 153, 387	c-3	231		?	HLA-DQA1, HLA-DQA2, HLA-DQB1, HLA-DQB2, HLA-DRB5	?			2.26016e-06	1.90506	C	0.188228	0.108507	T	0.524917	0.811772	0.891493	TF+DN+eQTL	Raj et al., 2014	3a	Less likely to affect binding
HLA-D (all signals)	SNP1	6:32552462-SNV	6	32552462	rs114660984	C	POLR2A, ZNF263, STAT5A, CTCF, SIN3A	556, 542, 298, 886, 189, 359	?	?	0	0	0	0	0	0	0.000838246	0.590435	T	0.0698577	0.112847	C	1.69367	0.930142	0.887153	TF		3a	Less likely to affect binding
HLA-D (all signals)	SNP2	6:32552603-SNV	6	32552603	rs113342592	C	POLR2A	556	?	?	0	0	0	0	0	0	0.00128888	0.616445	G	0.0692109	0.107639	C	1.6222	0.930789	0.892361	TF		4	TF binding +DNase peak
HLA-D (all signals)	SNP3	6:32552641-SNV	6	32552641	rs28724139	C	POLR2A	556	?	?	0	0	0	0	0	0	0.000278161	0.601606	T	0.0756792	0.119792	C	1.66222	0.924321	0.880208	TF		4	TF binding +DNase peak
HLA-D (all signals)	SNP4	6:32576324-SNV	6	32576324	rs36202959	C	POLR2A, TBP, RELA, RFX5, CTCF	827, 265, 329, 154, 801	c-7	295	0	?	HLA-DQA1, HLA-DQB1	?	0	0	0.000164033	0.542566	G	0.0640362	0.111979	C	1.84309	0.935964	0.888021	TF+DN+eQTL	Raj et al., 2014	3a	Less likely to affect binding
HLA-D (all signals)	SNP5	6:32577417-SNV	6	32577417	rs111463829	T	POLR2A, BCLAF1, IKZF1	1000, 227, 482	?	?	0	?	HLA-DQA1, HLA-DQB1	?	0	0	0.000343671	0.58116	G	0.0699482	0.114583	T	1.7207	0.930052	0.885417	TF+eQTL	Raj et al., 2014	3a	Less likely to affect binding
HLA-D (all signals)	SNP6	6:32577633-SNV	6	32577633	rs535777	G	POLR2A, BCLAF1, IKZF1, POU2F2, TBP, EBF1, PML, STAT1, TAF1, RELA, RFX5, KAP1, SPI1, CHD2, ZNF263, NFYA, NFYB, TEAD4, GTF2F1, FOXM1, USF2, CREB1, FOS, EP300, ZNF143, GATA1, BHLHE40	1000, 227, 482, 297, 934, 281, 466, 391, 552, 170, 376, 249, 967, 492, 273, 308, 263, 113, 804, 390, 335, 217, 329	c-120	1000	0	?	HLA-DQA2, HLA-DQB1, HLA-DRB5	?	0	0	4.16493e-05	1.68889	C	0.18564	0.118924	G	0.592104	0.81436	0.881076	TF+DN+eQTL	Raj et al., 2014	2b	Likely to affect binding
HLA-D (all signals)	SNP7	6:32583831-SNV	6	32583831	rs114822165	G	CTCF	555	?	?	0	?	HLA-DQA2, HLA-DQB1, HLA-DRB5	?	0	0	2.50215e-05	1.90334	C	0.1983	0.11501	G	0.525393	0.8017	0.88499	TF+eQTL	Raj et al., 2014	4	TF binding +DNase peak
HLA-D (all signals)	SNP8	6:32589065-SNV	6	32589065	rs78823360	A	POLR2A	1000	?	?	0	?	?	?	0	0	2.55078e-05	0.514711	G	0.0575679	0.106087	A	1.94284	0.942432	0.893913	TF+DN+eQTL		5	TF binding or DNase peak
HLA-D (all signals)	SNP9	6:32590154-SNV	6	32590154	rs9271546	T	POLR2A, ZNF263	1000, 275	c-60	1000	0	?	HLA-DQB1	?	0	0	2.34088e-07	0.654265	C	0.411384	0.516493	T	1.52843	0.588616	0.483507	TF+DN+eQTL	Raj et al., 2014	4	TF binding +DNase peak
HLA-D (all signals)	SNP10	6:32590159-SNV	6	32590159	rs9271547	C	POLR2A, ZNF263	1000, 275	c-60	1000	0	?	?	?	0	0	1.76608e-07	0.65252	A	0.410737	0.516493	C	1.53252	0.589263	0.483507	TF+DN		4	TF binding +DNase peak
HLA-D (all signals)	SNP11	6:32590363-Del	6	32590363	rs9271559	C	POLR2A, ZNF263, TAF1, WRNIP1, CTCF, YY1, RELA, RAD21, RFX5, IRF4, TBP, SMC3, TCF12, ZNF143, PAX5, TCF3, POU2F2, MAZ, MXI1	1000, 275, 320, 143, 254, 267, 638, 172, 154, 591, 142, 171, 206, 147, 829, 169, 238	c-60	1000	0	?	?	?	0	0	0.00499134	1.32442	C	0.179172	0.141493	-	0.755046	0.820828	0.858507	TF+DN		4	TF binding +DNase peak
HLA-D (all signals)	SNP12	6:32590364-SNV	6	32590364	rs114993630	C	POLR2A, ZNF263, TAF1, WRNIP1, CTCF, YY1, RELA, RAD21, RFX5, IRF4, TBP, SMC3, TCF12, ZNF143, PAX5, TCF3, POU2F2, MAZ, MXI1	1000, 275, 320, 143, 254, 267, 638, 172, 154, 591, 142, 171, 206, 147, 829, 169, 238	c-60	1000	0	?	?	?	0	0	2.62552e-05	1.71999	T	0.19599	0.124132	C	0.581398	0.80401	0.875868	TF+DN		4	TF binding +DNase peak
HLA-D (all signals)	SNP13	6:32590411-SNV	6	32590411	rs9271562	G	POLR2A, ZNF263, TAF1, WRNIP1, CTCF, YY1, RELA, RAD21, RFX5, IRF4, TBP, SMC3, TCF12, ZNF143, PAX5, TCF3, POU2F2, MAZ, MXI1, TBL1XR1, RUNX3, PML	1000, 275, 320, 143, 254, 267, 638, 172, 154, 591, 142, 171, 206, 147, 829, 169, 238, 233, 504	c-60	1000	0	0	0	0	0	0	0.0187434	1.32923	A	0.338292	0.277778	G	0.752317	0.661708	0.722222	TF+DN		1a	Likely to affect binding + Gene expression
HLA-D (all signals)	SNP14	6:32590482-SNV	6	32590482	rs2395224	C	POLR2A, ZNF263, TAF1, WRNIP1, CTCF, YY1, RELA, RAD21, RFX5, IRF4, TBP, SMC3, TCF12, ZNF143, PAX5, TCF3, POU2F2, MAZ, MXI1, TBL1XR1, RUNX3, PML, BHLHE40, NFIC, USF2, SPI1	1000, 275, 320, 143, 254, 267, 638, 172, 154, 591, 142, 171, 206, 147, 829, 169, 238, 233, 504, 263, 127, 546	c-60	1000	0	?	HLA-DQA2, HLA-DQB1, HLA-DRB5	?	0	0	0.000941838	1.47021	G	0.303109	0.228299	C	0.680175	0.696891	0.771701	TF+DN+eQTL	Raj et al., 2014	4	TF binding +DNase peak
HLA-D (all signals)	SNP15	6:32590483-SNV	6	32590483	rs111554896	C	POLR2A, ZNF263, TAF1, WRNIP1, CTCF, YY1, RELA, RAD21, RFX5, IRF4, TBP, SMC3, TCF12, ZNF143, PAX5, TCF3, POU2F2, MAZ, MXI1, TBL1XR1, RUNX3, PML, BHLHE40, NFIC, USF2, SPI1	1000, 275, 320, 143, 254, 267, 638, 172, 154, 591, 142, 171, 206, 147, 829, 169, 238, 233, 504, 263, 127, 546	c-60	1000	0	?	?	?	0	0	0.000748622	0.676826	T	0.181995	0.247396	C	1.47748	0.818005	0.752604	TF+DN		4	TF binding +DNase peak
HLA-D (all signals)	SNP16	6:32590899-SNV	6	32590899	rs75959827	G	POLR2A, RUNX3, PML, NFIC, NFATC1, RELA, ATF2, EP300, MEF2C, FOXM1, MTA3, SP1, BCL11A, TBP, EZH2, BHLHE40, POU2F2, STAT5A, ETS1, NFYB, MEF2A	1000, 504, 425, 312, 922, 204, 766, 440, 242, 233, 291, 153, 318, 448, 108, 296, 370	c-37	1000	0	?	HLA-DQB1	TAP2	0	0	8.72197e-07	0.654963	T	0.371928	0.474826	G	1.5268	0.628072	0.525174	TF+DN+eQTL	Raj et al., 2014; Westra et al., 2013	1f	Likely to affect binding + Gene expression
HLA-D (all signals)	SNP17	6:32590916-SNV	6	32590916	rs114631657	A	POLR2A, RUNX3, PML, NFIC, NFATC1, RELA, ATF2, EP300, MEF2C, FOXM1, MTA3, SP1, BCL11A, TBP, EZH2, BHLHE40, POU2F2, STAT5A, ETS1, NFYB, MEF2A	1000, 504, 425, 312, 922, 204, 766, 440, 242, 233, 291, 153, 318, 448, 108, 296, 370	c-37	1000	0	?	HLA-DQB1	?	0	0	1.1032e-06	0.656309	G	0.373221	0.475694	A	1.52367	0.626779	0.524306	TF+DN+eQTL	Raj et al., 2014	3a	Less likely to affect binding
HLA-D (all signals)	SNP18	6:32590953-SNV	6	32590953	rs77447343	T	POLR2A, RUNX3, PML, NFIC, NFATC1, RELA, ATF2, EP300, MEF2C, FOXM1, MTA3, SP1, BCL11A, TBP, EZH2, BHLHE40, POU2F2, STAT5A, ETS1, NFYB, MEF2A	1000, 504, 425, 312, 922, 204, 766, 440, 242, 233, 291, 153, 318, 448, 108, 296, 370	c-37	1000	0	LOC642073, BAT3, PSMB9, PSMB8, DDAH2	HLA-DQB1	?	0	0	8.3759e-07	0.654496	C	0.372574	0.475694	T	1.52789	0.627426	0.524306	TF+DN+eQTL	Raj et al., 2014;Fairfax et al., 2014	1b	Likely to affect binding + Gene expression
HLA-D (all signals)	SNP19	6:32591138-SNV	6	32591138	rs9271590	G	RUNX3, PML, NFIC, NFATC1, RELA, ATF2, EP300, TBP, EZH2, BHLHE40, POU2F2, NFYB, RFX5	1000, 504, 425, 312, 922, 291, 153, 318, 296	c-37	1000	0	?	?	?	0	0	1.89725e-06	0.66001	A	0.371281	0.472222	G	1.51513	0.628719	0.527778	TF+DN		2b	Likely to affect binding
HLA-D (all signals)	SNP20	6:32591141-SNV	6	32591141	rs114846898	G	RUNX3, PML, NFIC, NFATC1, RELA, ATF2, EP300, TBP, EZH2, BHLHE40, POU2F2, NFYB, RFX5	1000, 504, 425, 312, 922, 291, 153, 318, 296	c-37	1000	0	?	HLA-DQB1	?	0	0	9.77512e-07	0.655429	A	0.371281	0.473958	G	1.52572	0.628719	0.526042	TF+DN+eQTL	Raj et al., 2014	1b	Likely to affect binding + Gene expression
HLA-D (all signals)	SNP21	6:32591198-SNV	6	32591198	rs9271593	C	NFATC1, NFYB, RFX5	425, 296, 1000	?	?	0	?	?	?	0	0	6.50443e-10	1.69104	C	0.548701	0.418261	T	0.591353	0.451299	0.581739	TF		4	TF binding +DNase peak
HLA-D (all signals)	SNP22	6:32591777-SNV	6	32591777	rs79295810	G	NFIC, TBL1XR1, POLR2A, CHD2, RELA, IRF4, RFX5, RUNX3, POU2F2, BCL11A, SPI1, TAF1	224, 183, 809, 171, 209, 345, 215, 1000, 274, 169, 174	?	?	0	?	HLA-DQB1	?	0	0	9.55106e-07	0.657247	T	0.371928	0.473958	G	1.5215	0.628072	0.526042	TF+eQTL	Raj et al., 2014	4	TF binding +DNase peak
HLA-D (all signals)	SNP23	6:32609594-SNV	6	32609594	rs9272729	G	POLR2A	827	?	?	0	?	?	?	0	0	2.88476e-05	1.71098	A	0.188875	0.119792	G	0.584461	0.811125	0.880208	TF		5	TF binding or DNase peak
HLA-D (all signals)	SNP24	6:32610134-SNV	6	32610134	rs75076975	G	POLR2A	827	?	?	0	?	?	?	0	0	0.000320528	0.715913	A	0.256792	0.325521	G	1.39682	0.743208	0.674479	TF		5	TF binding or DNase peak
HLA-D (all signals)	SNP25	6:32626484-SNV	6	32626484	rs9273369	T	POLR2A, SPI1, TAF1, PAX5, POU2F2	933, 157, 155, 153, 387	c-3	231	0	?	HLA-DQA1, HLA-DQA2, HLA-DQB1, HLA-DQB2, HLA-DRB5	?	0	0	2.26016e-06	1.90506	C	0.188228	0.108507	T	0.524917	0.811772	0.891493	TF+DN+eQTL	Raj et al., 2014	3a	Less likely to affect binding
HLA-D (all signals)	SNP26	6:32628428-SNV	6	32628428	rs2854275	C	POLR2A	933	c-2	106	0	LOC642073, PSMB9, C2, HLA-DPB1, HSPA1A, ATF6B, CFB, CLIC1, TAP2, FKBPL	HLA-DQA2, HLA-DRB5	0	0	0	1.44783e-05	1.82457	A	0.183053	0.109375	C	0.548075	0.816947	0.890625	TF+DN+eQTL	Fairfax et al. 2014; Raj et al., 2014	1f	Likely to affect binding + Gene expression
HLA-D (all signals)	SNP27	6:32633498-SNV	6	32633498	rs9274467	G	POLR2A, EZH2, CTCF, CHD1, RFX5	1000, 337, 215, 183, 155	c-6	185	0	0	0	0	0	0	1.57463e-07	2.01425	T	0.194049	0.106771	G	0.496463	0.805951	0.893229	TF+DN		3a	Less likely to affect binding
HLA-D (all signals)	SNP28	6:32636602-SNV	6	32636602	rs9274671	G	POLR2A, IKZF1, ATF2, FOXM1, EP300, RELA, RFX5, YY1, RUNX3, CHD2, MEF2A, BHLHE40, NFYB, NFIC, SP1, USF2, TBP, FOS, POU2F2, TAF1, EBF1, PAX5, PML, RAD21	1000, 510, 239, 232, 429, 935, 203, 576, 249, 207, 617, 271, 374, 252, 161, 807, 104, 277, 256, 211, 342, 451, 120	?	?	0	0	0	0	0	0	4.36615e-06	1.87654	C	0.194049	0.113715	G	0.532896	0.805951	0.886285	TF		4	TF binding +DNase peak
HLA-D (all signals)	SNP29	6:32636646-SNV	6	32636646	rs9274678	A	POLR2A	1000	?	?	0	0	0	0	0	0	6.20764e-09	2.14396	G	0.238034	0.127178	A	0.466426	0.761966	0.872822	TF		4	TF binding +DNase peak
HLA-D (all signals)	SNP30	6:32653608-SNV	6	32653608	rs76025521	T	IKZF1, CEBPB, STAT5A, IRF4, MAZ, RCOR1, STAT3, RELA, MXI1, EP300, RUNX3, NFIC, BCL11A, EBF1, POU2F2, TBL1XR1, BHLHE40, USF2, MEF2A, TCF3, SP1, SPI1, FOXM1, ATF2, MEF2C, BATF, TBP, MTA3, ETS1, PAX5, SRF, TCF12, NFATC1, NFYB, CHD2, RFX5	586, 284, 347, 212, 237, 279, 230, 812, 264, 1000, 266, 255, 398, 445, 702, 192, 272, 300, 243, 326, 723, 648, 138, 593, 213, 479, 151, 612, 296, 454, 490, 610, 320	c-27	1000	0	0	0	TAP2	0	0	0.000143055	0.541868	C	0.0544041	0.095986	T	1.84547	0.945596	0.904014	TF+DN +eQTL	Westra et al., 2013	2c	Likely to affect binding
HLA-D (all signals)	SNP31	6:32657436-SNV	6	32657436	rs114055836	T	STAT5A, POLR2A, CEBPB, RELA, MAZ, MXI1, EP300, BCL3, MEF2A, SP1, CHD2, BCLAF1, POU2F2, NFIC, BCL11A, YY1, BATF, RUNX3, RFX5, MTA3, ATF2, NFATC1, FOXM1, TBP, PML, TAF1, PAX5, REST, IRF4	347, 549, 289, 935, 229, 170, 183, 156, 188, 175, 181, 282, 337, 687, 215, 572, 1000, 213, 595, 590, 391, 532, 534, 537	c-10	305	0	0	0	0	0	0	3.19883e-06	1.88649	C	0.190815	0.111111	T	0.530085	0.809185	0.888889	TF+DN		1f	Likely to affect binding + Gene expression
HLA-D (all signals)	SNP32	6:32668663-SNV	6	32668663	rs1794277	G	RFX5, SMC3, PRDM1, RAD21, YY1	252, 1000, 196, 264	?	?	0	0	0	0	0	0	5.35626e-06	1.87859	A	0.190168	0.111111	G	0.532313	0.809832	0.888889	TF		4	TF binding +DNase peak
HLA-DQB1 (signal2)	SNP1	6:32628428-SNV	6	32628428	rs2854275	C	POLR2A	933	c-2	106		LOC642073, PSMB9, C2, HLA-DPB1, HSPA1A, ATF6B, CFB, CLIC1, TAP2, FKBPL	HLA-DQA2, HLA-DRB5				1.44783e-05	1.82457	A	0.183053	0.109375	C	0.548075	0.816947	0.890625	TF+DN+eQTL	Fairfax et al. 2014; Raj et al., 2014	1f	Likely to affect binding + Gene expression
HLA-DQB1 (signal2)	SNP2	6:32633498-SNV	6	32633498	rs9274467	G	POLR2A, EZH2, CTCF, CHD1, RFX5	1000, 337, 215, 183, 155	c-6	185							1.57463e-07	2.01425	T	0.194049	0.106771	G	0.496463	0.805951	0.893229	TF+DN		3a	Less likely to affect binding
HLA-DQB1 (signal2)	SNP3	6:32636602-SNV	6	32636602	rs9274671	G	POLR2A, IKZF1, ATF2, FOXM1, EP300, RELA, RFX5, YY1, RUNX3, CHD2, MEF2A, BHLHE40, NFYB, NFIC, SP1, USF2, TBP, FOS, POU2F2, TAF1, EBF1, PAX5, PML, RAD21	1000, 510, 239, 232, 429, 935, 203, 576, 249, 207, 617, 271, 374, 252, 161, 807, 104, 277, 256, 211, 342, 451, 120	?	?							4.36615e-06	1.87654	C	0.194049	0.113715	G	0.532896	0.805951	0.886285	TF		4	TF binding +DNase peak
HLA-DQB1 (signal2)	SNP4	6:32636646-SNV	6	32636646	rs9274678	A	POLR2A	1000	?	?							6.20764e-09	2.14396	G	0.238034	0.127178	A	0.466426	0.761966	0.872822	TF		4	TF binding +DNase peak
HLA-DQB1 (signal2)	SNP5	6:32653608-SNV	6	32653608	rs76025521	T	IKZF1, CEBPB, STAT5A, IRF4, MAZ, RCOR1, STAT3, RELA, MXI1, EP300, RUNX3, NFIC, BCL11A, EBF1, POU2F2, TBL1XR1, BHLHE40, USF2, MEF2A, TCF3, SP1, SPI1, FOXM1, ATF2, MEF2C, BATF, TBP, MTA3, ETS1, PAX5, SRF, TCF12, NFATC1, NFYB, CHD2, RFX5	586, 284, 347, 212, 237, 279, 230, 812, 264, 1000, 266, 255, 398, 445, 702, 192, 272, 300, 243, 326, 723, 648, 138, 593, 213, 479, 151, 612, 296, 454, 490, 610, 320	c-27	1000				TAP2			0.000143055	0.541868	C	0.0544041	0.095986	T	1.84547	0.945596	0.904014	TF+DN +eQTL	Westra et al., 2013	2c	Likely to affect binding
HLA-DQB1 (signal2)	SNP6	6:32657436-SNV	6	32657436	rs114055836	T	STAT5A, POLR2A, CEBPB, RELA, MAZ, MXI1, EP300, BCL3, MEF2A, SP1, CHD2, BCLAF1, POU2F2, NFIC, BCL11A, YY1, BATF, RUNX3, RFX5, MTA3, ATF2, NFATC1, FOXM1, TBP, PML, TAF1, PAX5, REST, IRF4	347, 549, 289, 935, 229, 170, 183, 156, 188, 175, 181, 282, 337, 687, 215, 572, 1000, 213, 595, 590, 391, 532, 534, 537	c-10	305							3.19883e-06	1.88649	C	0.190815	0.111111	T	0.530085	0.809185	0.888889	TF+DN		1f	Likely to affect binding + Gene expression
HLA-DQB1 (signal2)	SNP7	6:32659087-SNV	6	32659087	rs9275220	T	?	?	?	?				TAP2			0.0196321	0.698106	C	0.203752	0.268229	T	1.43245	0.796248	0.731771	WestraeQTL	Westra et al., 2013	7	Histone mark/Eqtl
HLA-DQB1 (signal2)	SNP8	6:32659645-SNV	6	32659645	rs2856674	A	?	?	?	?							3.90359e-07	1.9644	G	0.191062	0.10733	A	0.509061	0.808938	0.89267	Peak SNP		5	TF binding or DNase peak
HLA-DQB1 (signal2)	SNP9	6:32666526-SNV	6	32666526	rs114733035	C	?	?	?	?		LOC642073, PSMB9, HLA-DPB1, C2, SKIV2L, ATF6B, NOTCH4, CLIC1, TAP2, FKBPL					0.000894572	1.68768	T	0.155844	0.0986038	C	0.59253	0.844156	0.901396	FairfaxeQTL	Fairfax et al. 2014	6	Motif hit
HLA-DQB1 (signal2)	SNP10	6:32667910-SNV	6	32667910	rs80108325	G	?	?	?	?		LOC642073, PSMB9, C2, HLA-DPB1, ATF6B, CFB, CLIC1, TAP2, FKBPL					1.0811e-06	1.99701	A	0.201164	0.111979	G	0.50075	0.798836	0.888021	FairfaxeQTL	Fairfax et al. 2014	7	Histone mark/Eqtl
HLA-DQB1 (signal2)	SNP11	6:32668663-SNV	6	32668663	rs1794277	G	RFX5, SMC3, PRDM1, RAD21, YY1	252, 1000, 196, 264	?	?							5.35626e-06	1.87859	A	0.190168	0.111111	G	0.532313	0.809832	0.888889	TF		4	TF binding +DNase peak
HLA-DQB1 (signal2)	SNP12	6:32668667-SNV	6	32668667	rs116320509	A	RFX5	252	?	?				TAP2			0.0150586	0.70808	G	0.225744	0.291667	A	1.41227	0.774256	0.708333	TF +eQTL	Westra et al., 2013	2b	Likely to affect binding
HLA-DQB1 (signal2)	SNP13	6:32672654-SNV	6	32672654	rs111720008	G	RELA	168	?	?							0.00587681	0.638992	T	0.1837	0.260453	G	1.56496	0.8163	0.739547	TF		4	TF binding +DNase peak
HLA-DQB1 (signal2)	SNP14	6:32672659-SNV	6	32672659	rs114554853	C	RELA	168	?	?							0.010056	0.665335	T	0.190168	0.26087	C	1.503	0.809832	0.73913	TF		3a	Less likely to affect binding
HLA-DQB1 (signal2)	SNP15	6:32672668-SNV	6	32672668	rs115460664	G	RELA	168	?	?				TAP2			0.0186328	0.674136	A	0.199224	0.269565	G	1.48338	0.800776	0.730435	TF +eQTL	Westra et al., 2013	3a	Less likely to affect binding
HLA-DQB1 (signal2)	SNP16	6:32674970-SNV	6	32674970	rs9275522	C	?	?	?	?				TAP2			0.00112485	0.668713	T	0.184347	0.252604	C	1.49541	0.815653	0.747396	WestraeQTL	Westra et al., 2013	6	Motif hit
HLA-DQB1 (signal2)	SNP17	6:32674994-SNV	6	32674994	rs112877904	C	?	?	?	?		LOC642073, TAP2, HLA-DQB2, PSMB8, DDAH2, C6ORF48, ATF6B		TAP2			0.00101911	0.662606	A	0.184347	0.25434	C	1.50919	0.815653	0.74566	FairfaxeQTL	Fairfax et al. 2014	6	Motif hit
HLA-DQB1 (signal2)	SNP18	6:32677088-SNV	6	32677088	rs114208743	C	?	?	?	?				TAP2			0.0017914	0.673172	T	0.189521	0.257812	C	1.4855	0.810479	0.742188	WestraeQTL	Westra et al., 2013	7	Histone mark/Eqtl
HLA-DQB1 (signal2)	SNP19	6:32678087-SNV	6	32678087	rs115661125	T	?	?	?	?				TAP2			0.000133824	0.634483	A	0.181641	0.259162	T	1.57609	0.818359	0.740838	WestraeQTL	Westra et al., 2013	6	Motif hit
HLA-DQB1 (signal2)	SNP20	6:32679326-SNV	6	32679326	rs114867306	C	?	?	1	203							4.92094e-06	1.89524	T	0.190168	0.110243	C	0.527639	0.809832	0.889757	DNaseI		5	TF binding or DNase peak
HLA-DQB1 (signal2)	SNP21	6:32679384-SNV	6	32679384	rs115083834	G	?	?	?	?				TAP2			0.000683336	0.6536	T	0.184347	0.256944	G	1.52999	0.815653	0.743056	WestraeQTL	Westra et al., 2013	6	Motif hit
HLA-DQB1 (signal2)	SNP22	6:32679462-SNV	6	32679462	rs114084573	A	?	?	?	?				TAP2			0.000792941	0.664298	G	0.188875	0.259549	A	1.50535	0.811125	0.740451	WestraeQTL	Westra et al., 2013	6	Motif hit
HLA-DQB1 (signal2)	SNP23	6:32680070-SNV	6	32680070	rs116831840	C	?	?	?	?		LOC642073, HLA-DQB2, TAP2, PSMB8, C6ORF48, DDAH2		TAP2			0.0086423	0.664577	T	0.180576	0.24902	C	1.50472	0.819424	0.75098	FairfaxeQTL	Fairfax et al. 2014	6	Motif hit
HLA-DQB1 (signal2)	SNP24	6:32680350-SNV	6	32680350	rs116002348	T	?	?	?	?				TAP2			0.00129245	0.663355	C	0.1875	0.258095	T	1.50749	0.8125	0.741905	WestraeQTL	Westra et al., 2013	7	Histone mark/Eqtl
HLA-DQB1 (signal2)	SNP25	6:32680480-SNV	6	32680480	rs114665001	T	?	?	?	?				TAP2			0.000358583	0.63389	C	0.177778	0.25434	T	1.57756	0.822222	0.74566	WestraeQTL	Westra et al., 2013	6	Motif hit
HLA-DQB1 (signal2)	SNP26	6:32680843-SNV	6	32680843	rs114604152	G	?	?	?	?				TAP2			0.000885883	0.662788	A	0.1837	0.253472	G	1.50878	0.8163	0.746528	WestraeQTL	Westra et al., 2013	6	Motif hit
HLA-DQB1 (signal2)	SNP27	6:32681355-SNV	6	32681355	rs116435884	T	?	?	?	?		LOC642073, HLA-DQB2, TAP2, PSMB8, C6ORF48, DDAH2		TAP2			0.000945647	0.660104	C	0.182406	0.252604	T	1.51491	0.817594	0.747396	FairfaxeQTL	Fairfax et al. 2014	7	Histone mark/Eqtl
HLA-DQB1 (signal2)	SNP28	6:32681992-SNV	6	32681992	rs3998158	T	?	?	?	?				TAP2			0.000415562	0.65319	C	0.176741	0.247368	T	1.53095	0.823259	0.752632	WestraeQTL	Westra et al., 2013	7	Histone mark/Eqtl
TNFAIP3	SNP1	6:138132123-SNV	6	138132123	rs58905141	A	MBD4, CBX3, MAX, RCOR1, HDAC2, ZNF143, MYBL2, HNF4A, EP300, TEAD4, RXRA, ARID3A, FOXA1, CEBPB, SP1, FOXA2, ELF1, GATA2, HNF4G, RAD21	317, 703, 195, 716, 331, 285, 535, 672, 389, 283, 182, 379, 303, 190, 279, 311, 165, 194, 769, 144	c-10	221							6.07097e-05	2.37465	G	0.0711514	0.03125	A	0.421114	0.928849	0.96875	TF+DN		2b	Likely to affect binding
TNFAIP3	SNP2	6:138132516-SNV	6	138132516	rs10499197	T	MBD4, ARID3A, CEBPB, MYBL2, PML, POLR2A, NFIC, STAT1, MTA3, RELA, CBX3, FOXA1, FOSL2, USF1, MAX, FOS	317, 177, 518, 273, 488, 1000, 418, 617, 351, 703, 244, 791, 958, 732	?	?							7.60786e-05	2.33101	G	0.0717982	0.0321181	T	0.428999	0.928202	0.967882	TF +GWAS		2b	Likely to affect binding
TNFAIP3	SNP3	6:138141899-SNV	6	138141899	rs677362	G	EBF1	443	?	?							1.04391e-05	1.59236	G	0.233463	0.160558	A	0.627997	0.766537	0.839442	TF		4	TF binding +DNase peak
TNFAIP3	SNP4	6:138142733-SNV	6	138142733	rs78515370	T	?	?	c-4	285							1.71741e-05	2.49261	C	0.072445	0.0303819	T	0.401186	0.927555	0.969618	DNaseI		5	TF binding or DNase peak
TNFAIP3	SNP5	6:138142737-SNV	6	138142737	rs2788289	A	?	?	c-4	285							3.50595e-06	1.6225	A	0.232212	0.157118	G	0.616333	0.767788	0.842882	DNaseI		5	TF binding or DNase peak
TNFAIP3	SNP6	6:138168028-SNV	6	138168028	rs111883038	C	POLR2A, TCF7L2, JUND, JUNB, MAX, RCOR1, FOSL1, ELF1, SPI1, EBF1	157, 277, 410, 221, 201, 223, 156, 192, 480, 317	c-19	1000							4.22857e-05	2.33101	A	0.0717982	0.0321181	C	0.428999	0.928202	0.967882	TF+DN		4	TF binding +DNase peak
TNFAIP3	SNP7	6:138168083-SNV	6	138168083	rs80126770	C	POLR2A, TCF7L2, JUND, JUNB, MAX, RCOR1, FOSL1, ELF1, SPI1, EBF1, RELA, NFIC	157, 277, 410, 221, 201, 223, 156, 192, 480, 317, 231, 239	c-19	1000							2.90923e-05	2.39791	T	0.0717982	0.03125	C	0.41703	0.928202	0.96875	TF+DN		4	TF binding +DNase peak
TNFAIP3	SNP8	6:138173422-SNV	6	138173422	rs7753873	A	?	?	c-2	124							8.17548e-06	1.67185	C	0.141009	0.0894097	A	0.598141	0.858991	0.91059	DNaseI		5	TF binding or DNase peak
TNFAIP3	SNP9	6:138187498-SNV	6	138187498	rs5029924	C	KDM5B, ZNF263, KAP1, GATA1, MYC, BHLHE40, POLR2A, HDAC1, JUN, PML, ARID3A, HDAC8, NR2F2, E2F6, FOS, GATA2, ZBTB7A, TRIM28, CEBPB, IRF1, ATF1, JUND, MAX, TBL1XR1, TBP, USF1, EGR1, TEAD4, BATF, SP1, STAT5A, FOSL1, TAL1, HDAC2, TCF7L2, MAZ, SPI1, ATF3, JUNB, EP300, RCOR1, FOSL2, YY1, SMARCB1, MAFK, SMARCA4	174, 406, 375, 344, 544, 366, 1000, 213, 676, 307, 161, 272, 403, 153, 864, 800, 771, 356, 289, 104, 183, 588, 414, 194, 287, 157, 879, 141, 134, 354, 852, 150, 154, 678, 168, 714, 510, 507, 589, 292, 205, 293, 200	c-125	1000							3.95611e-05	2.09386	T	0.0834411	0.0416667	C	0.477587	0.916559	0.958333	TF+DN		4	TF binding +DNase peak
TNFAIP3	SNP10	6:138190529-SNV	6	138190529	rs57087937	C	POLR2A, RELA, CTCF, ARID3A, TEAD4, STAT3, CEBPB, SMC3, RAD21	601, 225, 1000, 199, 280, 152, 169, 317, 550	c-19	336							2.05032e-06	1.90924	T	0.10414	0.0573913	C	0.523768	0.89586	0.942609	TF+DN		2b	Likely to affect binding
TNFAIP3	SNP11	6:138195151-SNV	6	138195151	rs5029937	G	POLR2A, MTA3, NFYB, TAF1, POU2F2, IKZF1, RUNX3, NFIC, SPI1, EBF1, TCF12, SIN3AK20, NFATC1, ATF2, BATF, EP300, IRF4, SP1, HSF1, BCL11A, RELA, ZNF143, TBP, FOS, E2F4, STAT3, HNF4A, MYC, FOSL2, TBL1XR1, NR3C1, RXRA, MYBL2, CEBPD, TEAD4, FOXM1, MEF2A, SMC3, BCL3, USF1, JUND, FOXA1, CEBPB, FOXA2, HDAC2, HNF4G, ARID3A	819, 514, 331, 221, 251, 398, 1000, 386, 375, 245, 195, 494, 299, 223, 708, 187, 440, 130, 160, 273, 657, 538, 145, 467, 570, 222, 166, 211, 597, 475, 156, 135, 173, 185, 832, 479, 508, 886	?	?							7.0533e-05	2.05217	T	0.0835492	0.0425347	G	0.48729	0.916451	0.957465	TF +GWAS		5	TF binding or DNase peak
TNFAIP3	SNP12	6:138195723-SNV	6	138195723	rs5029939	C	POLR2A, FOXA1, RXRA, IKZF1, RUNX3, WRNIP1, RELA, IRF4, ELF1, FOS, FOSL2, EBF1, BATF	639, 223, 124, 262, 324, 142, 369, 187, 528, 344, 192, 181, 520	c-50	542							2.8585e-05	2.09386	G	0.0834411	0.0416667	C	0.477587	0.916559	0.958333	TF+DN +GWAS		4	TF binding +DNase peak
TNFAIP3	SNP13	6:138196066-SNV	6	138196066	rs2230926	T	POLR2A	639	?	?						Coding	3.50084e-05	2.06661	G	0.084088	0.0425347	T	0.483883	0.915912	0.957465	TF +GWAS		4	TF binding +DNase peak
TNFAIP3	SNP14	6:138197506-SNV	6	138197506	rs5029949	A	?	?	c-2	155							6.67706e-05	2.13825	G	0.0782665	0.0381944	A	0.467673	0.921734	0.961806	DNaseI +GWAS		5	TF binding or DNase peak
TNFAIP3	SNP15	6:138227364-SNV	6	138227364	rs7752903	T	IRF1, BACH1, GATA2, MYC, MAFK, MAFF, CBX3, BCLAF1, TAL1, NFE2, TEAD4, EP300, RCOR1, TBL1XR1, TBP, JUND, POLR2A, MAX	187, 624, 340, 239, 850, 891, 403, 137, 205, 294, 570, 503, 611, 244, 189, 350, 306, 254	?	?							0.000178417	2.19218	G	0.0730918	0.0347222	T	0.456166	0.926908	0.965278	TF		3a	Less likely to affect binding
TNFAIP3	SNP16	6:138228520-SNV	6	138228520	rs9494894	T	USF1	229	?	?							6.80658e-05	2.186	C	0.0782665	0.0373913	T	0.457457	0.921734	0.962609	TF		4	TF binding +DNase peak
TNFAIP3	SNP17	6:138230040-SNV	6	138230040	rs117480515	T	PML, NFATC1, STAT5A, REST, RELA, BCLAF1, NFIC, TBL1XR1, EP300, BHLHE40, PAX5, EBF1, RUNX3, FOXM1, MEF2A, ATF2, BCL11A, MEF2C, MTA3, BATF, EGR1, BCL3	344, 356, 435, 298, 1000, 190, 967, 557, 187, 331, 198, 764, 917, 765, 320, 846, 588, 178, 564, 261	c-7	274							0.000200328	2.22895	A	0.072445	0.0338542	T	0.448643	0.927555	0.966146	TF+DN		2b	Likely to affect binding
TNFAIP3	SNP18	6:138230389-SNV	6	138230389	rs7749323	G	PML, STAT5A, ATF2, SPI1	344, 435, 765, 219	?	?							0.000178417	2.19218	A	0.0730918	0.0347222	G	0.456166	0.926908	0.965278	TF +GWAS		4	TF binding +DNase peak
TNFAIP3	SNP19	6:138243700-SNV	6	138243700	rs61117627	G	RELA	221	?	?							0.000183437	2.22895	A	0.072445	0.0338542	G	0.448643	0.927555	0.966146	TF		4	TF binding +DNase peak
TNFAIP3	SNP20	6:138243739-SNV	6	138243739	rs58721818	C	RELA	221	?	?							0.000183437	2.22895	T	0.072445	0.0338542	C	0.448643	0.927555	0.966146	TF		4	TF binding +DNase peak
ICA1	SNP1	7:8153521	7	8153521	rs3213702	G			2	257							0.0021509	0.62906	A	0.0502183	0.0775348	G	1.6	0.949782	0.922465	TF+DN		5	DNase peak
ICA1	SNP2	7:8153938	7	8153938	rs41282688	G	POLR2A; MTA3; NFATC1; ATF2; ELF1; YY1; IRF4; RELA; BCL3; TBL1XR1; RUNX3; RAD21; TCF3; PAX5; TBP; NFIC; CHD2; BCL11A; EBF1; MEF2A; SP1; FOXM1	309; 336; 344; 445; 308; 291; 227; 1000; 187; 192; 1000; 130; 132; 188; 140; 614; 158; 320; 377; 181; 144; 359	18	527							0.00360518	0.731746	C	0.0625	0.083499	G	1.4	0.9375	0.916501	TF+DN		4	TF binding +DNase peak
ICA1	SNP3	7:8155157	7	8155157	rs74787882	G	POU2F2; POLR2A; PML; EBF1;	668; 516; 347; 1000;	19	1000							0.00161097	0.670144	A	0.0586957	0.0851272	G	1.5	0.941304	0.914873	DNaseI		4	TF binding or DNase peak
ICA1	SNP4	7:8187094	7	8187094	rs10156091	T			7	676							0.0250258	1.57632	T	0.119253	0.0791016	C	0.634389	0.880747	0.920898	DNaseI		5	DNase peak
IRF5-TNPO3	SNP1	7:128575552-SNV	7	128575552	rs3778754	C	POLR2A, USF2, PML, NFIC, SPI1, RELA, MTA3, EP300, FOXM1, YY1, STAT5A, ATF2, RUNX3, POU2F2, STAT3, TCF3, TBP, BHLHE40, BCLAF1, NFATC1, MEF2C, CHD2, BCL11A, STAT1, MEF2A, IRF4, BATF, PAX5, SP1, BCL3, TCF12, EBF1, EGR1, TAF1, ELF1, NFYB, MAZ	792, 144, 411, 1000, 185, 371, 336, 495, 366, 504, 937, 506, 288, 385, 226, 291, 213, 616, 179, 224, 513, 183, 670, 576, 536, 303, 529, 466, 162, 206, 212, 147, 491, 270, 243, 307	?	?			TNPO3				6.81368e-06	0.688288	C	0.426261	0.519097	G	1.45288	0.573739	0.480903	TF +eQTL	Raj et al 2014	2b	Likely to affect binding
IRF5-TNPO3	SNP2	7:128579666-SNV	7	128579666	rs3823536	G	POLR2A, MXI1, TAF1, CTCF, SIN3A, IRF4, MAZ, EBF1, TBP, EZH2, E2F1, BCL3, RELA, ELF1, HDAC2, EGR1, ZNF263, MYC, SPI1, NRF1, TCF3, MTA3, RAD21, YY1, NFIC, BCL11A, POU2F2, STAT5A, USF1, RUNX3, TCF12, PAX5	1000, 196, 232, 207, 215, 229, 239, 968, 190, 540, 748, 157, 186, 747, 153, 362, 962, 349, 253, 395, 237, 310, 574, 122, 181, 171, 183, 311, 301, 453, 144, 289, 438, 392, 195, 203, 555, 416, 158, 682, 577	c-39	565			TNPO3				3.87602e-06	0.682845	G	0.424321	0.519097	A	1.46446	0.575679	0.480903	TF+DN +eQTL	Raj et al 2014	2b	Likely to affect binding
IRF5-TNPO3	SNP3	7:128580042-SNV	7	128580042	rs3778753	A	POLR2A, STAT5A, RELA, PML, TAF1, MAX, YY1, BCL11A	1000, 438, 682, 500, 157, 195, 155, 172	c-39	565			TNPO3				5.6438e-06	0.690111	A	0.426908	0.519097	G	1.44904	0.573092	0.480903	TF+DN +eQTL	Raj et al 2014	4	TF binding +DNase peak
IRF5-TNPO3	SNP4	7:128580047-SNV	7	128580047	rs3778752	G	POLR2A, RELA, PML, TAF1, MAX, YY1, BCL11A	1000, 682, 500, 157, 195, 155, 172	c-39	565			TNPO3				9.36615e-06	0.693768	G	0.428202	0.519097	T	1.4414	0.571798	0.480903	TF+DN +eQTL	Raj et al 2014	4	TF binding +DNase peak
IRF5-TNPO3	SNP5	7:128580048-SNV	7	128580048	rs79775079	A	POLR2A, RELA, PML, TAF1, MAX, YY1, BCL11A	1000, 682, 500, 157, 195, 155, 172	c-39	565			TNPO3				6.68748e-06	0.691937	A	0.427555	0.519097	T	1.44522	0.572445	0.480903	TF+DN +eQTL	Raj et al 2014	4	TF binding +DNase peak
IRF5-TNPO3	SNP6	7:128580680-SNV	7	128580680	rs3807306	G	POLR2A, ATF2, RCOR1, CHD1, RUNX3, WRNIP1, TBL1XR1, RELA, MAZ, NFIC, MYC, EP300, BHLHE40, CHD2, TBP, BCLAF1, BCL3, IRF1, MAX, MXI1, EBF1, SP1, POU2F2, TAF1, YY1, ELK1, SMC3, REST, MEF2A, TCF12, SPI1, BATF, ELF1, PAX5, USF2, EGR1, FOXM1, IRF4, NFATC1, BCL11A, SRF	1000, 246, 255, 167, 913, 165, 373, 442, 386, 325, 550, 348, 398, 315, 252, 273, 828, 389, 288, 512, 242, 199, 187, 154, 142, 216, 277, 208, 499, 862, 150, 262, 454, 410, 484, 480, 265	c-29	1000		IRF5	TNPO3	IRF5, TNPO3			1.15825e-05	0.694423	G	0.40815	0.498264	T	1.44004	0.59185	0.501736	TF+DN+GWAS+eQTL	Fairfax et al. 2014;Raj et al. 2014; Westra et al. 2013	1f	Likely to affect binding + Gene expression
IRF5-TNPO3	SNP7	7:128585616-SNV	7	128585616	rs35000415	C	POLR2A	270	c-10	274			TNPO3				2.57266e-06	1.5688	T	0.203105	0.139757	C	0.637431	0.796895	0.860243	TF+DN +eQTL	Raj et al 2014	4	TF binding +DNase peak
IRF5-TNPO3	SNP8	7:128589000-SNV	7	128589000	rs2070197	T	POLR2A, FOS, MYC, MAX	613, 278, 468, 773	c-3	210			TNPO3				2.47982e-06	1.57507	C	0.203752	0.139757	T	0.634892	0.796248	0.860243	TF+DN +GWAS +eQTL	Raj et al 2014	2b	Likely to affect binding
IRF5-TNPO3	SNP9	7:128589427-SNV	7	128589427	rs10954213	G	?	?	?	?			TNPO3				0.0165767	0.796396	G	0.329016	0.381076	A	1.25566	0.670984	0.618924	RajeQTL +GWAS	Raj et al 2014	5	TF binding or DNase peak
IRF5-TNPO3	SNP10	7:128617466-SNV	7	128617466	rs12531711	A	?	?	?	?			TNPO3				3.38999e-06	1.55754	G	0.203105	0.140625	A	0.642038	0.796895	0.859375	RajeQTL +GWAS	Raj et al 2014	6	Motif hit
IRF5-TNPO3	SNP11	7:128618559-SNV	7	128618559	rs17338998	C	?	?	?	?			TNPO3				4.33707e-06	1.55628	T	0.201811	0.139757	C	0.642559	0.798189	0.860243	RajeQTL	Raj et al 2014	7	Histone mark/Eqtl
IRF5-TNPO3	SNP12	7:128648953-SNV	7	128648953	rs35234849	T	NFATC1, FOXM1, EP300, NFIC, MEF2A, IRF4, JUND, ATF2, RUNX3, BATF	304, 528, 147, 674, 197, 213, 176, 479, 445, 586	c-13	306			TNPO3				5.11294e-06	1.56377	C	0.203752	0.140625	T	0.639481	0.796248	0.859375	TF+DN +eQTL	Raj et al 2014	4	TF binding +DNase peak
IRF5-TNPO3	SNP13	7:128651832-SNV	7	128651832	rs11767711	C	?	?	?	?					IRF5, TNPO3		0.0066525	0.772436	C	0.327943	0.387153	T	1.29461	0.672057	0.612847	eQTL in our panel	Our unpublished data	6	Motif hit
IRF5-TNPO3	SNP14	7:128683539-SNV	7	128683539	rs35188261	G	?	?	?	?			TNPO3				4.74683e-06	1.56501	A	0.205045	0.141493	G	0.638975	0.794955	0.858507	RajeQTL	Raj et al 2014	6	Motif hit
IRF5-TNPO3	SNP15	7:128713630-SNV	7	128713630	rs35429892	G	?	?	?	?			TNPO3				1.04618e-05	1.6227	A	0.222612	0.15	G	0.616255	0.777388	0.85	RajeQTL	Raj et al 2014	5	TF binding or DNase peak
IRF5-TNPO3	SNP16	7:128714746-SNV	7	128714746	rs13241591	A	CEBPB, FOXA1, CEBPD	545, 208, 118	c-2	224			TNPO3				2.12638e-07	1.66374	G	0.221216	0.145833	A	0.601055	0.778784	0.854167	TF+DN +eQTL	Raj et al 2014	4	TF binding +DNase peak
IRF5-TNPO3	SNP17	7:128714843-SNV	7	128714843	rs13229034	T	FOXA1, CEBPD	208, 118	c-2	224			TNPO3				1.15785e-07	1.6817	C	0.221863	0.144965	T	0.594637	0.778137	0.855035	TF+DN +eQTL	Raj et al 2014	3a	Less likely to affect binding
IRF5-TNPO3	SNP18	7:128715299-SNV	7	128715299	rs13232316	T	?	?	?	?			TNPO3				1.39895e-07	1.66912	A	0.220569	0.144965	T	0.599119	0.779431	0.855035	RajeQTL	Raj et al 2014	7	Histone mark/Eqtl
IRF5-TNPO3	SNP19	7:128718708-SNV	7	128718708	rs34350562	A	?	?	?	?							2.86807e-09	1.75936	G	0.227273	0.143229	A	0.568389	0.772727	0.856771	Genomewide		5	TF binding or DNase peak
IRF5-TNPO3	SNP20	7:128721724-SNV	7	128721724	rs17425212	C	?	?	c-2	210			TNPO3				4.68035e-07	1.63167	T	0.223803	0.150174	C	0.61287	0.776197	0.849826	DNaseI +eQTL	Raj et al 2014	5	TF binding or DNase peak
IRF5-TNPO3	SNP21	7:128721777-SNV	7	128721777	rs35144535	A	?	?	c-2	210			TNPO3				1.99051e-07	1.66107	G	0.217335	0.143229	A	0.602023	0.782665	0.856771	DNaseI +eQTL	Raj et al 2014	5	TF binding or DNase peak
IRF5-TNPO3	SNP22	7:128721797-SNV	7	128721797	rs77508372	T	?	?	c-2	210			TNPO3				9.56752e-08	1.68642	G	0.219922	0.143229	T	0.592973	0.780078	0.856771	DNaseI +eQTL	Raj et al 2014	5	TF binding or DNase peak
IRF5-TNPO3	SNP23	7:128721877-SNV	7	128721877	rs34591253	C	?	?	?	?			TNPO3				6.93795e-08	1.71328	T	0.212807	0.136285	C	0.583675	0.787193	0.863715	RajeQTL	Raj et al 2014	6	Motif hit
IRF5-TNPO3	SNP24	7:128722172-SNV	7	128722172	rs66872377	A	?	?	c-2	168			TNPO3				1.2436e-07	1.6754	C	0.221216	0.144965	A	0.596871	0.778784	0.855035	DNaseI +eQTL	Raj et al 2014	5	TF binding or DNase peak
IRF5-TNPO3	SNP25	7:128722237-SNV	7	128722237	rs71581969	C	?	?	c-2	168			TNPO3				9.49844e-08	1.6754	A	0.221216	0.144965	C	0.596871	0.778784	0.855035	DNaseI +eQTL	Raj et al 2014	5	TF binding or DNase peak
IRF5-TNPO3	SNP26	7:128722514-SNV	7	128722514	rs17340646	T	?	?	?	?		IRF5	TNPO3	IRF5, TNPO3			9.04429e-06	1.50303	G	0.293014	0.216146	T	0.665325	0.706986	0.783854	FairfaxeQTL + RajeQTL+ WestraeQTL	Fairfax et al. 2014	6	Motif hit
IRF5-TNPO3	SNP27	7:128722800-SNV	7	128722800	rs12540468	G	?	?	?	?			TNPO3				3.84247e-06	1.52617	A	0.292367	0.213043	G	0.655234	0.707633	0.786957	RajeQTL	Raj et al 2014	7	Histone mark/Eqtl
IRF5-TNPO3	SNP28	7:128723327-SNV	7	128723327	rs71581970	G	?	?	?	?			TNPO3				3.90714e-05	1.50814	A	0.294679	0.216931	G	0.663069	0.705321	0.783069	RajeQTL	Raj et al 2014	7	Histone mark/Eqtl
IRF5-TNPO3	SNP29	7:128723943-SNV	7	128723943	rs13227095	T	?	?	?	?			TNPO3	TNPO3, IRF5			1.92465e-05	1.47509	C	0.297542	0.22309	T	0.677926	0.702458	0.77691	RajeQTL	Raj et al 2014	1f	Likely to affect binding + Gene expression
XKR6	SNP1	8:10773511-SNV	8	10773511	rs4841457	T	CTCF, ELF1, RAD21	802221428	c-22	393		?	?	?			0.00293657	1.18124	T	0.510349	0.46875	G	0.846567	0.489651	0.53125	TF+DN		4	TF binding +DNase peak
XKR6	SNP2	8:10786543-SNV	8	10786543	rs11250092	G	E2F1	446	c-125	1000		?	?	XKR6,C8orf16			0.00617536	1.16829	G	0.503234	0.46441	A	0.855954	0.496766	0.53559	TF+DN+ WestraeQTL	Westra et al., 2013	1f	Likely to affect binding + Gene expression
XKR6	SNP3	8:10787612-SNV	8	10787612	rs4240673	T	?		?			?	?	XKR6,C8orf16			0.00303464	1.17449	T	0.50194	0.461806	C	0.85143	0.49806	0.538194	WestraeQTL	Westra et al., 2013	7	Histone mark/Eqtl
XKR6	SNP4	8:10788875-SNV	8	10788875	rs11783247	C	?	?	?	?		CTSB, XKR6, MSRA, PINX1					0.000723384	1.20478	C	0.518758	0.472222	T	0.83003	0.481242	0.527778	FairfaxeQTL	Fairfax et al. 2014	7	Histone mark/Eqtl
XKR6	SNP5	8:10802001-SNV	8	10802001	rs11250094	G	?		c-3	143		?	?	XKR6,C8orf16			0.00314744	1.16632	G	0.50194	0.463542	C	0.857397	0.49806	0.536458	DN+ WestraeQTL	Westra et al., 2013	5	TF binding or DNase peak
XKR6	SNP6	8:10839803-SNV	8	10839803	rs10089518	C	?		?			?	?	XKR6, XKR6,C8orf16			0.000608576	0.847026	T	0.468952	0.510417	C	1.1806	0.531048	0.489583	WestraeQTL	Westra et al., 2013	7	Histone mark/Eqtl
XKR6	SNP7	8:10965442-SNV	8	10965442	rs7832722	G	?		?			XKR6, MSRA, CTSB	MTMR9	XKR6, MTMR9, XKR6,C8orf16			0.000732251	0.845911	A	0.355757	0.394965	G	1.18216	0.644243	0.605035	FairfaxeQTL + RajeQTL + WestraeQTL	Fairfax et al. 2014; Raj et al., 2014; Westra et al., 2013	7	Histone mark/Eqtl
XKR6	SNP8	8:10966678-SNV	8	10966678	rs11778121	G	?		?			?	MTMR9	XKR6, MTMR9, XKR6,C8orf16			0.00070056	0.842496	C	0.358991	0.399306	G	1.18695	0.641009	0.600694	RajeQTL + WestraeQTL	Raj et al., 2014; Westra et al., 2013	7	Histone mark/Eqtl
XKR6	SNP9	8:10967122-SNV	8	10967122	rs6601563	C	?		?			?	MTMR9	XKR6, MTMR9, XKR6,C8orf16			0.000506064	0.833368	T	0.353169	0.395833	C	1.19995	0.646831	0.604167	RajeQTL + WestraeQTL	Raj et al., 2014; Westra et al., 2013	7	Histone mark/Eqtl
XKR6	SNP10	8:10969235-SNV	8	10969235	rs4618656	T	?		?			?	MTMR9	XKR6, MTMR9, XKR6,C8orf16, AMAC1L2			0.000756171	0.833553	A	0.344114	0.386285	T	1.19968	0.655886	0.613715	RajeQTL + WestraeQTL	Raj et al., 2014; Westra et al., 2013	6	Motif hit
XKR6	SNP11	8:11030935-SNV	8	11030935	rs7000132	T	?		?			?	?	?			0.000473825	0.848105	C	0.418425	0.458969	T	1.1791	0.581575	0.541031	Peak SNP		6	Motif hit
BLK	SNP1	8:11344573-SNV	8	11344573	rs7829381	A	SETDB1, CBX3	284, 338	?	?			68	C8orf13,C8orf12, BLK			0.000121738	0.800579	G	0.468057	0.523601	A	1.2491	0.531943	0.476399	TF +eQTL	Westra et al., 2013	3a	Less likely to affect binding
BLK	SNP2	8:11347625-SNV	8	11347625	rs4840567	T	SETDB1, FOXA1, FOXA2, CEBPB	257, 532, 254, 272	?	?			68,39,5	C8orf13,C8orf12, BLK			0.000472602	0.821456	C	0.47348	0.522609	T	1.21735	0.52652	0.477391	TF +eQTL	Westra et al., 2013	1f	Likely to affect binding + Gene expression
BLK	SNP3	8:11349147-SNV	8	11349147	rs7822109	T	YY1	160	c-3	306				C8orf13,C8orf12, BLK			8.56562e-05	0.792102	C	0.463589	0.521777	T	1.26246	0.536411	0.478223	TF+DN +eQTL	Westra et al., 2013	2b	Likely to affect binding
BLK	SNP4	8:11350899-SNV	8	11350899	rs1382567	T	POLR2A, RUNX3, FOXM1, ATF2, BATF, POU2F2, TAF1, PAX5, RELA, MEF2C, EBF1, PML, MTA3, BCL3, MXI1, MAZ, EP300, NFATC1, TBL1XR1, YY1, BCLAF1, MAX, EGR1, MEF2A, STAT5A, STAT3, ELF1, BCL11A, TCF12, SPI1, BHLHE40, PBX3, CHD2, IRF4, RAD21, RXRA, TCF3, SMC3, SRF, WRNIP1, CEBPB, SP1, CHD1, TBP, SIN3A	1000, 184, 185, 630, 380, 720, 748, 710, 247, 254, 903, 767, 243, 177, 246, 444, 769, 540, 661, 850, 149, 292, 920, 145, 92, 765, 240, 315, 189, 287, 318, 219, 222, 183, 194, 162, 324, 216, 178, 396, 237, 952, 207, 191, 146, 198, 164	c-8	585		CTSB		C8orf13,C8orf12, BLK			0.00101682	0.83231	C	0.476714	0.522569	T	1.20148	0.523286	0.477431	TF+DN+eQTL	Fairfax et al. 2014	4	TF binding +DNase peak
BLK	SNP5	8:11352261-SNV	8	11352261	rs13272061	G	POLR2A, CHD2, MTA3, ELF1, SIN3A, CHD1, TAF1	1000, 196, 382, 563, 304, 261, 274	?	?			67,40,6	C8orf13,C8orf12, BLK			0.000566484	0.828093	T	0.470246	0.517361	G	1.20759	0.529754	0.482639	TF +eQTL	Westra et al., 2013	2b	Likely to affect binding
BLK	SNP6	8:11415812-SNV	8	11415812	rs6983727	C	POLR2A, CTCF	588, 1000	?	?							0.00122724	0.828742	T	0.42238	0.46875	C	1.20665	0.57762	0.53125	TF		1f	Likely to affect binding + Gene expression
BLK	SNP7	8:11422442-SNV	8	11422442	rs7822958	C	POLR2A, EZH2, CTCF, GABPA, TBP, RAD21, MYC, FOXM1, HMGN3, BACH1, MXI1, CHD2, MAX, MTA3, BHLHE40, PAX5, ELF1, REST, YY1, MAZ, UBTF, E2F6, ZNF143, FOXP2, POU2F2, HDAC2, USF2, SMC3, TAF7, USF1, E2F4, ATF2, RUNX3, BCL3	848, 793, 429, 198, 218, 518, 461, 244, 443, 364, 206, 431, 256, 255, 1000, 312, 363, 238, 197, 225, 226, 194, 316, 875, 428, 310, 322, 151, 166, 189, 124, 252, 378, 593	?	?		XKR6, CTSB	42,32,6	C8orf13,C8orf12, BLK			0.00139739	0.827024	A	0.423575	0.470486	C	1.20915	0.576425	0.529514	TF +eQTL	Fairfax et al. 2014	4	TF binding +DNase peak
BLK	SNP8	8:11422491-SNV	8	11422491	rs7823100	C	POLR2A, MYC, UBTF	848, 443, 316	?	?							0.00147765	0.82886	A	0.424968	0.471354	C	1.20648	0.575032	0.528646	TF		3a	Less likely to affect binding
BLK	SNP9	8:11422492-SNV	8	11422492	rs7823101	C	POLR2A, MYC	848, 443	?	?							0.00147765	0.82886	G	0.424968	0.471354	C	1.20648	0.575032	0.528646	TF		3a	Less likely to affect binding
BLK	SNP10	8:11423083-SNV	8	11423083	rs11985709	A	POLR2A	848	c-6	157				C8orf13,C8orf12, BLK			0.00158921	0.829553	C	0.424321	0.470486	A	1.20547	0.575679	0.529514	TF+DN +eQTL	Westra et al., 2013	4	TF binding +DNase peak
ETS1	SNP1	11:128310346-SNV	11	128310346	rs34516251	G	?	?	?	?	3						0.00706389	0.814959	A	0.182344	0.214851	G	1.22706	0.817656	0.785149	Histone marks		5	TF binding or DNase peak
ETS1	SNP2	11:128311059-SNV	11	128311059	rs6590330	G	?	?	?	?	2						0.04345	1.11	A	0.12	0.1	G	0.89	0.87	0.89	Histone marks		6	Motif hit
ETS1	SNP3	11:128317168-SNV	11	128317168	rs7932088	G	?	?	?	?		HS.132376					0.0178781	0.88406	T	0.343251	0.371542	G	1.13114	0.656749	0.628458	FairfaxeQTL	Fairfax et al. 2014	5	TF binding or DNase peak
ETS1	SNP4	11:128320072-SNV	11	128320072	rs4612820	C	?	?	?	?	3						0.026625	0.897111	T	0.341642	0.366466	C	1.11469	0.658358	0.633534	Histone marks		3a	Less likely to affect binding
ETS1	SNP5	11:128320459-SNV	11	128320459	rs11600936	G	?	?	?	?	2						0.0107045	0.881497	A	0.342105	0.371032	G	1.13443	0.657895	0.628968	Histone marks		3a	Less likely to affect binding
ETS1	SNP6	11:128321254-SNV	11	128321254	rs4936050	A	?	?	c-2	249							0.0237398	1.35715	A	0.177023	0.136811	G	0.736839	0.822977	0.863189	DNaseI		5	TF binding or DNase peak
ITGAM-ITGAX	SNP1	16:31276811-SNV	16	31276811	rs1143679	G	CTCF, EP300, RAD21, SPI1, ATF2, EBF1, POLR2A, FOSL2, BCL3, RUNX3, RELA, SP1, JUND, CEBPB, POU2F2, STAT3, MYC, ELF1, BATF, NR3C1, BCL11A, FOS, NFIC, PAX5, TCF12, IRF4	472, 228, 237, 241, 267, 1000, 485, 582, 220, 635, 194, 323, 211, 254, 144, 223, 169, 351, 163, 341, 861, 303, 448, 179, 167	c-77	1000		ITGAM, PYCARD				Coding	7.05966e-07	1.81455	A	0.190168	0.114583	G	0.5511	0.809832	0.885417	TF+DN+GWAS+eQTL	Fairfax et al. 2014	4	TF binding +DNase peak
ITGAM-ITGAX	SNP2	16:31282970-SNV	16	31282970	rs34082782	G	?	?	c-2	314							2.97111e-07	1.85776	A	0.214474	0.128136	G	0.538282	0.785526	0.871864	DNaseI		5	TF binding or DNase peak
ITGAM-ITGAX	SNP3	16:31283323-SNV	16	31283323	rs35472514	C	?	?	c-7	161							8.59888e-07	1.79114	G	0.19599	0.119792	C	0.558303	0.80401	0.880208	DNaseI		5	TF binding or DNase peak
ITGAM-ITGAX	SNP4	16:31310372-SNV	16	31310372	rs9888879	T	CTCF, SMC3, RAD21	959, 374, 514	c-15	272		ITGAM, PYCARD, ITGAX		ITGAX			8.06597e-08	1.84918	C	0.206339	0.123264	T	0.54078	0.793661	0.876736	TF+DN+eQTL	Fairfax et al. 2014	4	TF binding +DNase peak
ITGAM-ITGAX	SNP5	16:31311715-SNV	16	31311715	rs12928810	G	?	?	?	?		ITGAM, PYCARD, ITGAX		ITGAX			6.11035e-07	1.90103	A	0.201308	0.117063	G	0.526029	0.798692	0.882937	FairfaxeQTL	Fairfax et al. 2014	5	TF binding or DNase peak
ITGAM-ITGAX	SNP6	16:31313253-SNV	16	31313253	rs9888739	C	?	?	?	?		ITGAM, PYCARD, ITGAX		ITGAX			4.63531e-08	1.82634	T	0.202335	0.121951	C	0.547543	0.797665	0.878049	FairfaxeQTL +GWAS	Fairfax et al. 2014	5	TF binding or DNase peak
ITGAM-ITGAX	SNP7	16:31335906-SNV	16	31335906	rs41476751	T	?	?	c-2	138							7.84481e-09	1.86964	C	0.245796	0.148438	T	0.534862	0.754204	0.851562	DNaseI		5	TF binding or DNase peak
ITGAM-ITGAX	SNP8	16:31336888-SNV	16	31336888	rs1143683	C	?	?	?	?		ITGAM, PYCARD, ITGAX		ITGAX		Coding	6.11254e-08	1.84914	T	0.23868	0.144965	C	0.540792	0.76132	0.855035	FairfaxeQTL +GWAS	Fairfax et al. 2014	4	TF binding +DNase peak
ITGAM-ITGAX	SNP9	16:31337677-SNV	16	31337677	rs41440449	A	?	?	?	?			ITGAX				0.00647447	0.784776	G	0.310479	0.364583	A	1.27425	0.689521	0.635417	RajeQTL	Raj et al 2014	7	Histone mark/Eqtl
ITGAM-ITGAX	SNP10	16:31339625-SNV	16	31339625	rs28372932	G	?	?	?	?			ITGAX				0.00695875	0.790686	A	0.310479	0.362847	G	1.26473	0.689521	0.637153	RajeQTL	Raj et al 2014	5	TF binding or DNase peak
ITGAM-ITGAX	SNP11	16:31340086-SNV	16	31340086	rs60312440	C	NFATC1, SUZ12	389, 103	?	?							1.24222e-07	1.90009	T	0.234177	0.138623	C	0.526292	0.765823	0.861377	TF		5	TF binding or DNase peak
ITGAM-ITGAX	SNP12	16:31340216-SNV	16	31340216	rs4889543	C	NFATC1, SUZ12	389, 103	?	?			ITGAX				0.00514591	0.774599	T	0.468927	0.532692	C	1.29099	0.531073	0.467308	TF +eQTL	Raj et al 2014	5	TF binding or DNase peak
ITGAM-ITGAX	SNP13	16:31340997-SNV	16	31340997	rs7193268	C	?	?	c-13	193				ITGAX			1.04377e-06	1.77917	T	0.23794	0.149293	C	0.562059	0.76206	0.850707	DNaseI +eQTL	Westra et al., 2013	5	TF binding or DNase peak
ITGAM-ITGAX	SNP14	16:31343005-SNV	16	31343005	rs1143678	C	EZH2, CTCF, RAD21, STAT5A, HDAC8, POLR2A	624, 166, 246, 333, 185, 340	c-30	684		ITGAM, PYCARD, ITGAX		ITGAX		Coding	1.50459e-07	1.80412	T	0.23674	0.146701	C	0.554286	0.76326	0.853299	TF+DN+eQTL	Fairfax et al. 2014	2b	Likely to affect binding
ITGAM-ITGAX	SNP15	16:31343386-SNV	16	31343386	rs9933520	A	EZH2, STAT5A, HDAC8, POLR2A, NFIC, REST, TCF3, BCL3, POU2F2, NFATC1, PBX3	624, 333, 185, 340, 239, 165, 173, 904, 246, 676, 324	c-12	254				ITGAX			1.27678e-07	1.80372	G	0.235446	0.145833	A	0.554409	0.764554	0.854167	TF+DN +eQTL	Westra et al., 2013	1d	Likely to affect binding + Gene expression
ITGAM-ITGAX	SNP16	16:31344309-SNV	16	31344309	rs7195945	T	?	?	?	?			ITGAX				0.00202366	0.75591	C	0.460543	0.530382	T	1.32291	0.539457	0.469618	RajeQTL	Raj et al 2014	7	Histone mark/Eqtl
ITGAM-ITGAX	SNP17	16:31345023-SNV	16	31345023	rs36100148	C	SIN3A, YY1, CTCF	502, 181, 1000	?	?							0.0031134	0.765169	T	0.461837	0.528646	C	1.3069	0.538163	0.471354	TF		4	TF binding +DNase peak
ITGAM-ITGAX	SNP18	16:31346344-SNV	16	31346344	rs62051517	T	EBF1	614	?	?							0.00117402	0.750687	C	0.457956	0.529514	T	1.33211	0.542044	0.470486	TF		5	TF binding or DNase peak
ITGAM-ITGAX	SNP19	16:31347519-SNV	16	31347519	rs9673398	A	?	?	c-2	153			ITGAX				0.00947835	0.797243	G	0.309832	0.360243	A	1.25432	0.690168	0.639757	DNaseI +eQTL	Raj et al 2014	5	TF binding or DNase peak
ITGAM-ITGAX	SNP20	16:31347541-SNV	16	31347541	rs9674009	C	?	?	c-2	153			ITGAX				0.00357521	0.761196	A	0.460543	0.528646	C	1.31372	0.539457	0.471354	DNaseI +eQTL	Raj et al 2014	5	TF binding or DNase peak
ITGAM-ITGAX	SNP21	16:31347592-SNV	16	31347592	rs9673404	A	?	?	c-2	153							0.00376509	0.76318	T	0.46119	0.528646	A	1.31031	0.53881	0.471354	DNaseI		5	TF binding or DNase peak
ITGAM-ITGAX	SNP22	16:31347599-SNV	16	31347599	rs9673405	A	?	?	c-2	153			ITGAX				0.00421939	0.767163	C	0.462484	0.528646	A	1.3035	0.537516	0.471354	DNaseI +eQTL	Raj et al 2014	5	TF binding or DNase peak
ITGAM-ITGAX	SNP23	16:31347648-SNV	16	31347648	rs9673522	T	?	?	c-2	153			ITGAX				0.00376509	0.76318	C	0.46119	0.528646	T	1.31031	0.53881	0.471354	DNaseI +eQTL	Raj et al 2014	5	TF binding or DNase peak
ITGAM-ITGAX	SNP24	16:31347748-SNV	16	31347748	rs3925075	A	?	?	c-2	153		ITGAM, BCKDK, HSD3B7, ITGAX, VKORC1	ITGAX	ITGAX			0.00396422	0.765169	G	0.461837	0.528646	A	1.3069	0.538163	0.471354	FairfaxeQTL + RajeQTL+ WestraeQTL+DNaseI	Fairfax et al. 2014	1f	Likely to affect binding + Gene expression
ITGAM-ITGAX	SNP25	16:31347807-SNV	16	31347807	rs3925074	G	?	?	?	?			ITGAX				0.0026626	0.760526	A	0.46119	0.529514	G	1.31488	0.53881	0.470486	RajeQTL	Raj et al 2014	7	Histone mark/Eqtl
ITGAM-ITGAX	SNP26	16:31355895-SNV	16	31355895	rs11859300	G	NFYB	124	?	?							4.01055e-07	1.80781	T	0.23622	0.146087	G	0.553157	0.76378	0.853913	TF		5	TF binding or DNase peak
ITGAM-ITGAX	SNP27	16:31359826-SNV	16	31359826	rs11645917	C	RUNX3	287	c-2	193			ITGAX	ITGAX			0.00600149	0.770484	T	0.464424	0.529514	C	1.29789	0.535576	0.470486	TF+DN +eQTL	Raj et al 2014	2b	Likely to affect binding
ITGAM-ITGAX	SNP28	16:31360944-SNV	16	31360944	rs12923297	T	SPI1	202	?	?				ITGAX			0.00299604	0.762508	C	0.461837	0.529514	T	1.31146	0.538163	0.470486	TF +eQTL	Westra et al., 2013	4	TF binding +DNase peak
ITGAM-ITGAX	SNP29	16:31363253-SNV	16	31363253	rs10747210	C	ATF2, ELF1, RELA, FOXM1, EP300, SPI1, NFIC, EBF1, MEF2A, BCL11A, SP1, IRF4, CEBPB, RUNX3, TBL1XR1, MTA3, POU2F2	313, 175, 362, 240, 327, 1000, 601, 757, 194, 268, 149, 292, 246, 920, 317, 490, 312	c-29	1000							0.00136575	0.755289	T	0.456016	0.526042	C	1.324	0.543984	0.473958	TF+DN		4	TF binding +DNase peak
ITGAM-ITGAX	SNP30	16:31363381-SNV	16	31363381	rs4632147	C	?	?	c-29	1000		ITGAM, PYCARD, ITGAX	ITGAX	ITGAX			1.94138e-06	1.71388	T	0.236093	0.152778	C	0.583472	0.763907	0.847222	FairfaxeQTL + RajeQTL+ WestraeQTL+DNaseI	Fairfax et al. 2014	4	TF binding +DNase peak
ITGAM-ITGAX	SNP31	16:31368874-SNV	16	31368874	rs11574637	T	?	?	?	?		ITGAM, PYCARD, ITGAX		ITGAX			1.04312e-07	1.77282	C	0.248383	0.157118	T	0.564072	0.751617	0.842882	FairfaxeQTL +GWAS	Fairfax et al. 2014	5	TF binding or DNase peak
CCL22-CX3CL1	SNP1	16:57386566-SNV	16	57386566	rs223881	T	TCF12, NFIC, RELA, FOXM1	189, 373, 347, 282	c-8	261							1.00931e-06	1.46093	T	0.29841	0.22549	C	0.684494	0.70159	0.77451	TF+DN		4	TF binding +DNase peak
CCL22-CX3CL1	SNP2	16:57391768-SNV	16	57391768	rs223888	A	STAT5A, ATF2, BCLAF1, RELA, EP300, MEF2A, IRF4, SP1, RUNX3, PAX5, WRNIP1, SPI1, BCL11A, BCL3, NFIC, POU2F2, TCF12, BATF, SRF, EBF1, MTA3, FOXM1, ELF1	291, 358, 178, 387, 369, 128, 280, 186, 1000, 221, 134, 456, 190, 455, 325, 227, 235, 207, 374, 301, 535	c-15	623							3.81394e-05	1.41882	A	0.270504	0.207198	G	0.70481	0.729496	0.792802	TF+DN		1a	Likely to affect binding + Gene expression
CCL22-CX3CL1	SNP3	16:57392241-SNV	16	57392241	rs223889	T	?	?	c-2	111							4.93025e-07	1.45918	T	0.344928	0.265166	C	0.685316	0.655072	0.734834	DNaseI		5	TF binding or DNase peak
CCL22-CX3CL1	SNP4	16:57409270-SNV	16	57409270	rs223873	A	?	?	c-8	234							8.93579e-06	1.46663	A	0.250366	0.185484	C	0.681837	0.749634	0.814516	DNaseI		5	TF binding or DNase peak
CCL22-CX3CL1	SNP5	16:57412200-SNV	16	57412200	rs172783	A	JUND, EP300, E2F4, CEBPB, FOSL2, FOS, RAD21	308, 174, 323, 231, 788, 429, 254	?	?							2.22219e-05	1.44537	A	0.250735	0.188	G	0.691865	0.749265	0.812	TF		4	TF binding +DNase peak
CCL22-CX3CL1	SNP6	16:57414623-SNV	16	57414623	rs170361	A	?	?	c-8	277		CCL22, COQ9					0.000108566	1.39392	A	0.246356	0.189961	G	0.7174	0.753644	0.810039	DNaseI +eQTL	Fairfax et al. 2014	5	TF binding or DNase peak
CCL22-CX3CL1	SNP7	16:57417134-SNV	16	57417134	rs4151117	G	?	?	c-3	200		CCL22					7.28798e-07	1.45404	G	0.277536	0.208984	T	0.687741	0.722464	0.791016	DNaseI +eQTL	Fairfax et al. 2014	5	TF binding or DNase peak
CCL22-CX3CL1	SNP8	16:57419286-SNV	16	57419286	rs614230	C	?	?	c-5	295							0.000209832	1.28746	C	0.412791	0.353175	T	0.776722	0.587209	0.646825	DNaseI		5	TF binding or DNase peak
ZGLP1-RAVER1	SNP1	19:10418251-SNV	19	10418251	rs35186095	C	?	?	?	?			ICAM3				0.000210099	1.31738	T	0.211705	0.169339	C	0.759083	0.788295	0.830661	RajeQTL	Raj et al 2014	5	TF binding or DNase peak
ZGLP1-RAVER1	SNP2	19:10418838-SNV	19	10418838	rs35063123	G	?	?	?	?			ICAM3				0.000263998	1.29158	A	0.203247	0.164931	G	0.774246	0.796753	0.835069	RajeQTL	Raj et al 2014	3a	Less likely to affect binding
ZGLP1-RAVER1	SNP3	19:10419468-SNV	19	10419468	rs55905227	C	?	?	?	?			ICAM3				0.00066048	1.27132	T	0.20272	0.166667	C	0.786581	0.79728	0.833333	RajeQTL	Raj et al 2014	5	TF binding or DNase peak
ZGLP1-RAVER1	SNP4	19:10421917-SNV	19	10421917	rs67500360	G	MAFF, MAFK	283, 429	?	?							0.00147494	1.42481	A	0.0972763	0.0703125	G	0.701849	0.902724	0.929688	TF		2b	Likely to affect binding
ZGLP1-RAVER1	SNP5	19:10422004-SNV	19	10422004	rs35193259	A	MAFF, MAFK	283, 429	?	?		FLJ12949, ICAM3					0.0234296	1.1804	G	0.236057	0.207465	A	0.847171	0.763943	0.792535	TF +eQTL	Fairfax et al. 2014	4	TF binding +DNase peak
ZGLP1-RAVER1	SNP6	19:10422166-SNV	19	10422166	rs12462532	C	MAFK	429	?	?			ICAM3				0.00259536	1.26771	T	0.203974	0.168142	C	0.788823	0.796026	0.831858	TF +eQTL	Raj et al 2014	5	TF binding or DNase peak
ZGLP1-RAVER1	SNP7	19:10423875-SNV	19	10423875	rs12983510	T	?	?	?	?		FLJ12949, ICAM3		ICAM3			0.0204197	1.18494	C	0.23961	0.210069	T	0.843926	0.76039	0.789931	FairfaxeQTL	Fairfax et al. 2014	7	Histone mark/Eqtl
ZGLP1-RAVER1	SNP8	19:10424911-SNV	19	10424911	rs7408715	C	?	?	?	?			ICAM3				0.00797964	1.23577	T	0.198175	0.166667	C	0.809211	0.801825	0.833333	RajeQTL	Raj et al 2014	6	Motif hit
ZGLP1-RAVER1	SNP9	19:10426024-SNV	19	10426024	rs1124765	T	RFX5, CHD1, CTCF, TAF1, MYBL2	254, 240, 255, 156, 241	?	?	Hsmm						0.0169476	1.19949	G	0.238003	0.206597	T	0.833686	0.761997	0.793403	TF		4	TF binding +DNase peak
ZGLP1-RAVER1	SNP10	19:10428790-SNV	19	10428790	rs12459144	C	ZNF143, SPI1	235, 246	?	?		FLJ12949, ICAM3, ICAM4		ICAM3			0.0186564	1.19337	T	0.238034	0.207465	C	0.837963	0.761966	0.792535	TF +eQTL	Fairfax et al. 2014	2b	Likely to affect binding
ZGLP1-RAVER1	SNP11	19:10429566-SNV	19	10429566	rs3745264	C	?	?	?	?			ICAM3	ICAM3			0.00353657	1.2433	A	0.197147	0.164931	C	0.804314	0.802853	0.835069	RajeQTL	Raj et al 2014	1f	Likely to affect binding + Gene expression
ZGLP1-RAVER1	SNP12	19:10432334-SNV	19	10432334	rs12983649	T	?	?	?	?			ICAM1, ICAM3				0.000573213	1.2728	G	0.204929	0.168403	T	0.785669	0.795071	0.831597	RajeQTL	Raj et al 2014	5	TF binding or DNase peak
ZGLP1-RAVER1	SNP13	19:10432924-SNV	19	10432924	rs4804500	A	POLR2A, MYC	478, 154	?	?							0.0229814	1.1889	G	0.237354	0.207465	A	0.841111	0.762646	0.792535	TF		2b	Likely to affect binding
ZGLP1-RAVER1	SNP14	19:10434886-SNV	19	10434886	rs12611016	G	?	?	?	?			ICAM3				0.00324019	1.25428	A	0.197539	0.164062	G	0.797273	0.802461	0.835938	RajeQTL	Raj et al 2014	7	Histone mark/Eqtl
ZGLP1-RAVER1	SNP15	19:10436562-SNV	19	10436562	rs7507634	C	?	?	?	?			ICAM3				0.0022501	1.30623	T	0.153048	0.121528	C	0.765559	0.846952	0.878472	RajeQTL	Raj et al 2014	5	TF binding or DNase peak
ZGLP1-RAVER1	SNP16	19:10452358-SNV	19	10452358	rs12462167	A	?	?	?	?			ICAM3				0.000216612	1.60702	G	0.0837004	0.0537849	A	0.622271	0.9163	0.946215	RajeQTL	Raj et al 2014	7	Histone mark/Eqtl
UBE2L3	SNP1	22:21921686-SNV	22	21921686	rs140490	G	E2F6, WRNIP1,SETDB1	117319144			9.4						1.69866e-06	1.55	T	0.27	0.19	G	0.64	0.73	0.8	TF+Histonetone		4	TF binding +DNase peak
UBE2L3	SNP2	22:21923144-SNV	22	21923144	rs140492	A	POLR2A, HDAC2, ZKSCAN1, PHF8, ELF1, SP1, MAZ, BACH1, MAX, ELK1, ARID3A, PAX5, CHD2, TCF12, ZBTB7A, FOXP2, RCOR1, SMC3, TBL1XR1, EP300, RELA, TAF1, USF1, BHLHE40, EGR1, GABPA, KAP1, E2F4, JUND, CTCF, CEBPD, ATF3, TCF3, GTF2F1, ETS1, RBBP5, YY1, MYC, ZNF143, TBP, MEF2A, BCL3, SRF, RAD21, SPI1, REST, SIX5, TAF7, KDM5B, SIN3AK20, JUNB, MXI1, KDM5A, FOSL1, SIN3A, THAP1, HDAC6, ZBTB33, HDAC1, E2F6, RFX…	1000, 207, 526, 178, 262, 225, 153, 541, 233, 805, 162, 99, 376, 558, 400, 211, 281, 219, 484, 166, 256, 135, 305, 595, 897, 804, 571, 266, 112, 173, 131, 824, 298, 565, 384, 133, 217, 205, 129, 193, 635, 146, 377, 385, 170, 892, 449, 130, 165, 152, 134, 149, 214, 150, 237, 259, 204, 142, 265, 232, 296, 154, 147, 273, 192, 222, 391, 139, 127, 215	?	?	Hsmm						9.53698e-07	1.5084	C	0.269082	0.196181	A	0.662953	0.730918	0.803819	TF		4	TF binding +DNase peak
UBE2L3	SNP3	22:21927064-SNV	22	21927064	rs140498	G	POLR2A, TBL1XR1, HDAC2, MAZ, MAFK	433, 240, 146, 172, 209	?	?		UBE2L3					5.24288e-06	1.45579	A	0.260026	0.194444	G	0.68691	0.739974	0.805556	TF +eQTL	Fairfax et al. 2014	4	TF binding +DNase peak
UBE2L3	SNP4	22:21928916-SNV	22	21928916	rs181360	T	POLR2A, CHD1	433, 174	?	?		UBE2L3					7.36595e-06	1.45407	G	0.258732	0.193576	T	0.687723	0.741268	0.806424	TF +eQTL	Fairfax et al. 2014	1f	Likely to affect binding + Gene expression
UBE2L3	SNP5	22:21933780-SNV	22	21933780	rs181366	C	?	?	?	?	6						1.98456e-07	1.52174	T	0.269728	0.195312	C	0.657144	0.730272	0.804688	Histone marks		5	TF binding or DNase peak
UBE2L3	SNP6	22:21939675-SNV	22	21939675	rs5754217	G	POLR2A, KDM5B	196, 192	?	?		UBE2L3					1.18097e-06	1.4985	T	0.267788	0.196181	G	0.667334	0.732212	0.803819	TF +GWAS +eQTL	Fairfax et al. 2014	2b	Likely to affect binding
UBE2L3	SNP7	22:21943938-SNV	22	21943938	rs1034329	T	CHD1, HDAC8, FOS	148, 187, 156	?	?		UBE2L3					6.76307e-06	1.4509	C	0.259379	0.194444	T	0.689225	0.740621	0.805556	TF +eQTL	Fairfax et al. 2014	2b	Likely to affect binding
UBE2L3	SNP8	22:21945851-SNV	22	21945851	rs5998619	G	POLR2A, FOSL1, SPI1, EBF1, GTF2F1	255, 119, 429, 1000, 145	?	?		UBE2L3					5.12029e-06	1.4639	A	0.260026	0.193576	G	0.683108	0.739974	0.806424	TF +eQTL	Fairfax et al. 2014	4	TF binding +DNase peak
UBE2L3	SNP9	22:21949411-SNV	22	21949411	rs2070512	A	POLR2A, ELK1, RCOR1, PML, HDAC2	475, 141, 195, 254, 144	?	?							9.09253e-07	1.5084	C	0.269082	0.196181	A	0.662953	0.730918	0.803819	TF		4	TF binding +DNase peak
UBE2L3	SNP10	22:21973319-SNV	22	21973319	rs4821116	C	?	?	?	?		UBE2L3, YDJC					1.28302e-05	1.44396	T	0.254204	0.190972	C	0.692538	0.745796	0.809028	FairfaxeQTL	Fairfax et al. 2014	1b	Likely to affect binding + Gene expression
UBE2L3	SNP11	22:21976934-SNV	22	21976934	rs7444	T	POLR2A, CEBPB	623, 346	?	?		UBE2L3, YDJC					1.83074e-06	1.48537	C	0.267141	0.197049	T	0.673231	0.732859	0.802951	TF +eQTL	Fairfax et al. 2014	3a	Less likely to affect binding
UBE2L3	SNP12	22:21979096-SNV	22	21979096	rs11089637	T	POLR2A, SMC3	623, 106	?	?		UBE2L3					2.03132e-06	1.49971	C	0.229625	0.165799	T	0.666797	0.770375	0.834201	TF +eQTL	Fairfax et al. 2014	1f	Likely to affect binding + Gene expression
UBE2L3	SNP13	22:21980894-SNV	22	21980894	rs4821130	C	POLR2A, TBL1XR1, ZNF263, JUNB, ELK1, USF2, CHD2, MAFK, MAZ, EP300, MAFF	623, 189, 605, 130, 226, 182, 218, 207, 181, 256, 173	?	?		UBE2L3					6.292e-06	1.46069	T	0.260673	0.194444	C	0.684607	0.739327	0.805556	TF +eQTL	Fairfax et al. 2014	4	TF binding +DNase peak
UBE2L3	SNP14	22:21982249-SNV	22	21982249	rs878825	T	TBL1XR1, POLR2A	170, 212	?	?		UBE2L3					2.18622e-06	1.48967	C	0.268782	0.197917	T	0.671288	0.731218	0.802083	TF +eQTL	Fairfax et al. 2014	1f	Likely to affect binding + Gene expression
UBE2L3	SNP15	22:21982892-SNV	22	21982892	rs2298428	C	ELK1, RCOR1, CHD2, POLR2A, BHLHE40, EP300, ZNF143, MAZ, MAFK, SMC3, RFX5, CTCF, MYC, MAX	176, 214, 245, 1000, 293, 179, 286, 262, 255, 165, 149, 453, 747, 803	?	?		UBE2L3				Coding	8.356e-06	1.47937	T	0.25	0.183888	C	0.675966	0.75	0.816112	TF +eQTL	Fairfax et al. 2014	4	TF binding +DNase peak
UBE2L3	SNP16	22:21983260-SNV	22	21983260	rs2298429	A	POLR2A, E2F6, ZNF263, MYC, MAX, TFAP2A, ESR1, TFAP2C	1000, 325, 153, 676, 136	?	?							9.26252e-07	1.51402	G	0.265888	0.193043	A	0.660492	0.734112	0.806957	TF		1f	Likely to affect binding + Gene expression
