# Supplementary material for: Regulatory polymorphisms modulate the expression of HLA class II molecules and promote autoimmunity
Source: eLife. 2016 Feb 15;5:e12089. doi: 10.7554/eLife.12089 (PMC4811771; doi:10.7554/eLife.12089)
Supplement: Supplementary file 3. — (A) Conditional analysis on SLE associated 16 peak SNPs.(B) Calculation of joint PAR on 16 SLE risk loci. DOI: http://dx.doi.org/10.7554/eLife.12089.023 [file elife-12089-supp3.xlsx]

## Sheet: 3A
Supplemental File 3A. Conditional analysis on 16 peak SNPs
Risk Locus	Peak SNP	Chromosome: Position	Chi-sq P-value (adjusted for gender)	P conditional on rs12612769 (STAT4)	P conditional on rs9271593 (HLA-D)	P conditional on rs41476751 (ITGAM)	P conditional on rs34350562 (IRF5)	P conditional on rs181366 (UBE2L3)	P conditional on rs4699260 (BANK1)	P conditional on rs62382335 (TNIP1)	P conditional on rs57087937 (TNFAIP3)	P conditional on rs223889 (CCL22)	P conditional on rs35186095 (RAVER1)	P conditional on rs74787882 (ICA1)	P conditional on rs1819717 (TNFSF4)	P conditional on rs7822109 (BLK)	P conditional on rs4840545 (XKR6)	P conditional on rs41272536 (NMNAT2)	P conditional on rs34516251 (ETS1)
STAT4	rs12612769	2:191953998	5.17316e-10		1.2e-09	1.2e-09	4.2e-09	4.4e-09	5.2e-09	4.3e-09	2e-09	1.1e-07	6.6e-09	6.9e-08	3.9e-09	4.7e-09	7.8e-09	4.6e-10	7.1e-09
HLA-D	rs9271593 (XL9)	6:32591198	6.5e-10	4.3e-09		8900000000	5.1e-09	6.2e-10	6.7e-10	1e-09	1.1e-09	2.7e-07	1.4e-08	3.2e-08	6.6e-08	9.9e-10	1.2e-10	2e-09	4.8e-08
ITGAM-ITGAX	rs41476751	16:31335906	7.84481e-09	1.2e-09	2.1e-08		1.2e-09	1.5e-09	5.2e-10	1.7e-09	2.1e-09	2.5e-08	1.1e-08	5.1e-08	5.3e-08	1e-09	2.1e-09	7e-09	1.9e-07
IRF5_TNPO3	rs34350562	7:128718708	2.86807e-09	1e-08	9.4e-08	4.3e-09		7.3e-09	1.1e-08	1.7e-08	2e-08	4e-07	5e-07	1.4e-06	1.4e-07	1.3e-08	1e-08	1.2e-08	2.9e-07
UBE2L3	rs181366	22:21933780	1.98456e-07	5.7e-06	1.5e-06	2e-06	2.1e-06		2e-06	1.2e-05	3.2e-06	4.2e-05	0.0005	2.2e-05	6.1e-06	1.6e-05	9.8e-07	3e-06	1.3e-05
BANK1	rs4699260	4:102725298	8.54999e-06	6.2e-05	1.3e-05	6.1e-06	3.1e-05	1.8e-05		9.7e-05	5.5e-05	1.3e-06	1e-06	1.1e-06	2.5e-06	2.2e-05	2.8e-05	1.2e-05	1.1e-06
TNIP1	rs62382335	5:150425032	6.41903e-05	0.001	0.0007	0.0005	0.001	0.003	0.002		0.001	0.001	0.001	0.0007	0.0005	0.001	0.0002	0.0001	0.0005
TNFAIP3	rs57087937	6:138190529	2.05032e-06	3.3e-06	6.5e-06	2.8e-06	7.7e-06	3.3e-06	6e-06	5.8e-06		1.1e-05	1.6e-05	8.7e-06	8.4e-07	4e-06	4.5e-06	7.6e-06	8.8e-06
CCL22-CX3CL1	rs223889	16:57392241	4.93025e-07	1.6e-05	7.1e-06	9.8e-06	5.8e-06	8.1e-06	1e-05	7.6e-06	4.3e-06		6.5e-06	2.8e-06	2e-07	3.7e-06	1.7e-06	3.7e-06	3.9e-06
RAVER1-ZGLP1	rs35186095	19:10418251	0.000210099	0.0004	5.4e-05	0.0002	0.0002	0.0009	0.0005	0.0004	0.0006	0.001		0.0008	0.0003	0.0002	0.0002	0.0001	0.0005
ICA1	rs74787882	7:8155157	0.00161097	0.002	0.003	0.004	0.003	0.001	0.001	0.003	0.001	0.001	0.002		0.001	0.002	0.001	0.003	0.001
TNFSF4	rs1819717	1:173310285	2.29017e-05	0.0001	0.0001	0.0002	0.0001	0.0001	7.2e-05	0.0001	7.4e-05	0.0001	0.0002	0.0001		0.0001	5e-05	8.8e-05	3.1e-05
BLK	rs7822109	8:11349147	8.56562e-05	0.002	0.0008	0.001	0.001	0.004	0.001	0.005	0.001	0.001	0.003	0.001	0.003		5.5e-05	0.001	0.001
XKR6	rs4840545	8:10972281	1.26935e-07	6.3e-06	5e-07	1.7e-06	2.3e-06	6.1e-07	1.9e-06	5.9e-07	2.6e-06	2.4e-07	8.7e-07	6.3e-07	1.2e-07	5.2e-08		3.2e-06	3.3e-07
NMNAT2-SMG7	rs41272536	1:183440531	1.87834e-08	4.6e-10	5.6e-09	1.2e-08	2.9e-09	3.2e-09	1.8e-09	8e-10	5.3e-09	4.8e-08	1.4e-08	2.8e-08	3.9e-09	4.4e-09	7.7e-09		4.8e-09
ETS1	rs34516251	11:128310346	0.00706389	0.05	0.03	0.08	0.03	0.04	0.01	0.05	0.02	0.01	0.01	0.01	0.03	0.02	0.02	0.04

## Sheet: 3B
Supplemental File 3B. Calculation of joint PAR on 16 SLE risk loci
Gene	Peak risk-associated functional haplotype	Frequency in SLE	Frequency in Healthy (p)	Risk Haplotype [odds ratio(95%CI)]	PAR% = 100 × p(odds ratio − 1) ÷ [p(odds ratio − 1) + 1]
STAT4	ATTCCTTGC	0.28	0.19	1.7 (1.3-1.9)	11.7(5.4-14.6)
HLA-D	CCCCTCCATCT-AGCGATGGCGAGCATCGTCA	0.175	0.093	2.1 (1.6-2.6)	9.3(5.3-13.0)
ITGAM-ITGAX	AAGCATCTAGTCTTGTCTACAATAGTCTCTC	0.16	0.09	2.0 (1.5-2.5)	7.9(4.3-11.9)
IRF5-TNPO3	GAGTTTTCAGTCTAAGCAGTGGTCAGAAC	0.16	0.09	1.8 (1.2-2.3)	6.7(1.8-10.5)
UBE2L3	TCAGTTCACTCCTCTG	0.18	0.14	1.4 (1.1-1.7)	5.4(1.4-8.9)
BANK1	ATCTCGACGCATGCGGATTGGAAC	0.45	0.39	1.3 (1.0-1.4)	10.5(0-13.5)
TNIP1	AATACGGTC	0.11	0.09	1.3 (1.0-1.6)	2.8(0-5.1)
TNFAIP3	GGGCAATCTTTGGGGCAAAT	0.07	0.03	2.2 (1.5-3.3)	3.6(1.5-6.5)
CCL22-CX3CL1	TATAAAGC	0.22	0.17	1.5 (1.1-1.7)	7.1(1.7-10.6)
ZGLIP-RAVER1	TATAGTCTGTAGGATG	0.07	0.04	1.5 (1.0-2.1)	2.0(0-4.2)
ICA1	GGGT	0.12	0.08	1.5 (1.1-1.9)	3.8(0.8-6.7)
TNFSF4	TCCATCTTCGA	0.23	0.19	1.3 (1.0-1.6)	5.4(0-10.2)
BLK	ATTTGCCCCA	0.48	0.44	1.3 (1.0-1.5)	11.7(0-18.0)
XKR6	TGTCGCGGCTT	0.46	0.4	1.2 (1.0-1.4)	8.4(0-13.8)
NMNAT2-SMG7	TCACTAAC	0.14	0.11	1.3 (1.0-1.6)	3.2(0-6.2)
ETS1	GGGCGA	0.18	0.14	1.4 (1.0-1.7)	5.3(0-8.9)
					16 1 – [Π(1 − PARi)] i=1
				Population risk	66.45 (65.78-68.87)
